# Supplementary material for: Risk communication successes and limits during sismo-volcanic crisis: the example of Mayotte, France
Source: Copernicus journal article supplement (doi:10.5194/nhess-2021-164), 2021-07-02
Supplement: Supplementary file [file nhess-2021-164-AC1-supplement.pdf]

# 1 Risk communication during sismo- 2 volcanic crises: the example of Mayotte, 3 France

a supprimé: successes and limits

a supprimé: i

4  
5 Maud Devès<sup>1,2</sup>, Robin Lacassin<sup>1</sup>, Hugues Pécourt<sup>3</sup>, Geoffrey Robert<sup>1</sup>

6  
7 <sup>1</sup> Université de Paris, Institut de physique du globe de Paris, CNRS UMR 7154, 75005 Paris,  
8 France, contact author: [deves@ipggp.fr](mailto:deves@ipggp.fr)

9  
10 <sup>2</sup> Université de Paris, Institut Humanités Sciences Sociétés, Centre de Recherche Psychanalyse  
11 Médecine et Société, CNRS EA 3522, 75013 Paris, France

12  
13 <sup>3</sup> Université de Paris, Collège international des sciences territoriales, CNRS FR 2007, 75013  
14 Paris, France

## 15 Abstract

a supprimé: On 10 May 2018, an active seismic crisis began on French island of Mayotte, which a year later will be shown to be related to offshore volcanic activity. It affects a vulnerable territory exposed to risks of many kinds (poverty, violence, lack of basic resources). In the absence of known events in human memory, the population is naive with regard to seismic and volcanic hazards. The concern is therefore very strong. In spite of a large number of , the communication set up by the main actors of the risk chain does not answer the population's concern. To understand why, we analyse a large corpus of the textual communications (press releases, web pages, scientific bulletins, reports, etc.) issued by the authorities and scientists from May 2018 to April 2021. We draw lessons on the communication strategy put in place in the first three years of the crisis; and we issue recommendations for improvement in the future, in Mayotte, but also elsewhere in contexts where comparable geo-crises may happen. We notably stress the importance of ensuring that communication is not overly technical, that it aims to inform rather than reassure, that it focuses on risk and not only on hazard and that it provides clues to possible risk scenarios.¶

43 Population information is a fundamental issue for effective disaster risk reduction. As  
44 demonstrated by numerous past and present crises, implementing an effective communication  
45 strategy is however not a trivial matter. This paper draws lessons from the seismo-volcanic “crisis”  
46 that began in the French overseas department of Mayotte in May 2018 and is still ongoing today.

47 Mayotte’s case study is interesting because: i) although the seismo-volcanic phenomenon  
48 itself is associated with moderate impacts, it triggered a social crisis that risk managers  
49 themselves qualified as “a communication crisis”, ii) risks are perceived mostly indirectly by the  
50 population, which poses specific challenges, in particular to scientists who are placed at the heart  
51 of the risk communication process, iii) no emergency planning or monitoring had ever been done  
52 in the department of Mayotte with respect to volcanic issues before May 2018, which means that  
53 the framing of monitoring and risk management, as well as the strategies adopted to share  
54 information with the public, have evolved over time.

55 Our first contribution is to document the gradual organisation of the official response. Our  
56 second contribution is an attempt to understand what may have led to the reported  
57 “communication crisis”. To that end, we collect and analyse the written information delivered by  
58 the main actors of monitoring and risk management to the public over the last three years. Finally,  
59 we compare its volume, timing and content with what is known of at-risk populations information  
60 needs. Our results outline the importance of ensuring that communication is not overly technical,  
61 that it aims to inform rather than reassure, that it focuses on risk and not only on hazard and that  
62 it provides clues to possible risk scenarios. We finally issue recommendations for improvement  
63 of public information about risks, in the future, in Mayotte, but also elsewhere in contexts where  
64 comparable geo-crises may happen.

65

66

## 1. Introduction

67 As recalled by the Sendai Framework for Disaster Risk Reduction, population information  
68 is a fundamental issue for effective disaster risk reduction (UNISDR, 2015, article 18.g.). Some  
69 researchers even consider that a disaster is a result of a crisis or a breakdown in the  
70 communication process (e.g. Gilbert, 1998). Implementing an effective communication strategy  
71 is however not a trivial matter. As pointed out by previous studies, and as exemplified by the  
72 current COVID-19 crisis, there are numerous pitfalls (see Lagadec, 1993; Lindell, Prater and Perry  
73 2006 or Rodriguez et al., 2007 for overviews). Deciding what content, format and medium to use  
74 to share information is a first challenge. The information held by the actors in charge of risk  
75 management is often partial, sometimes contradictory, especially at the beginning of a crisis when  
76 there are many unknowns; the information available - and especially the information produced by  
77 scientists - can be difficult to translate into operational terms when there are large uncertainties;  
78 actors might also have difficulties in sharing information and/or in coordinating (see Doyle and  
79 Paton, 2018; Donovan, Bravo and Oppenheimer, 2012; Donovan and Oppenheimer, 2012;  
80 Fearnley and Beaven, 2018 for application on volcanic risks). Reaching the population at-risk is  
81 a next challenge. Traditional channels (press releases, public conferences, mass media) may  
82 allow reaching a majority of people, but might not help reaching minorities whose habits, customs,  
83 and sometimes day-to-day language, differ (Lindell and Perry, 2004). And, it is not enough for a

84 message to reach people, it must then be understood, believed and confirmed to have a chance  
85 to induce the expected response (e.g. Mileti and Sorensen, 1990; Mileti, 1999; Lindell and Perry,  
86 2004). This implicitly raises the issue of trust and of the perceived credibility and legitimacy of  
87 information providers (see Haynes, Barclay and Pidgeon, 2008 for a reflection on the importance  
88 of trust in the management of volcanic risks).

89  
90 The present paper contributes to the effort made by human and social sciences to build  
91 knowledge on risk communication processes. It draws lessons from the seismo-volcanic “crisis”  
92 that began in the French overseas department of Mayotte in May 2018 and is still ongoing at the  
93 time of writing. It focuses on “public information” i.e. on the information shared by the actors in  
94 charge of monitoring and risk management with the public. The corresponding processes are  
95 sometimes called “external” communication processes, “internal” communication referring to the  
96 exchanges taking place between the actors (e.g. Becker et al., 2018).

97 Mayotte’s case study is interesting because, although the seismo-volcanic phenomenon  
98 itself has been associated with moderate impacts (see section 2), it triggered a social crisis that  
99 the risk managers themselves qualified as “a communication crisis” (see section 3). The situation  
100 has eased in part nowadays but scientists and authorities are still regularly taken to task,  
101 especially on social media (see section 5). Mayotte’s case study is also interesting because, with  
102 the exception of felt seismicity, deep sea dead fishes occasionally found by fishermen, and gas  
103 bubbling in a few spots on land, risks are perceived mostly indirectly by the population at risk. As  
104 Skotnes, Hansen and Krovel (2021) point out, risk and crisis communication about “invisible”  
105 hazards poses specific challenges. While trust is a key factor in communication in general, it  
106 becomes all the more crucial when one must rely entirely on the knowledge and experience of  
107 others to make decisions. The seismo-volcanic phenomena at stake here are not, strictly  
108 speaking, “invisible” (not in the sense of chemical or radiological pollution for instance) but  
109 everything one knows about it comes from scientific observation and interpretation. This puts  
110 scientists at the heart of the risk communication processes. Public information emerges thus in  
111 Mayotte, more than ever, as an end product of a complex interface between science, policy and  
112 society. Decrypting this interface’s mechanisms and dynamics is necessary to help actors,  
113 including scientists, better understand their role and its limits<sup>1</sup>.

114  
115 Scientists and authorities have complementary roles to play with respect to population  
116 information. The local and national authorities are in charge of informing populations at risk about  
117 the nature and evolution of the threat and about the measures put in place to manage or reduce  
118 it. Scientists have a key role to play in helping the other stakeholders of the “risk chain”, including  
119 the at-risk population and the wider public, to comprehend scientific information as the latter is  
120 often too technical for non-specialists (e.g. Newhall, 1999; Fearnley and Beaven, 2018). This role  
121 is essential to maintain the legitimacy and credibility of the information on which public decisions  
122 are based, scientists being generally more trusted than their official counterparts (e.g. Eiser et al.,

---

<sup>1</sup> As emphasized by Jasanoff (2004), although science is produced by a specific method in a specific social context, it is influenced by the broader social and political context in which scientists themselves are embedded (this is especially true in risk management contexts when scientists intervene not as researchers but as experts). And science in turn influences the way societies order themselves and organize their response.

123 2008 on the predictors of trust and Donovan, 2021 for an overview of the challenges faced by  
124 experts in crisis contexts).

125 In Mayotte, as far as seismo-volcanic risk is concerned, a disaster has not yet occurred -  
126 the seismic crisis, although worrying for the population, has not caused significant damage. But  
127 many questions remain unanswered concerning the potential effects of the current activity in the  
128 short or medium term (see section 2). Today's challenges are therefore those of scientific  
129 research to understand, monitoring to alert, and prevention and preparedness to reduce potential  
130 impacts, improve emergency management, and foster individual and collective resilience. As a  
131 recent report commissioned by the French ministry in charge of risk management (*ministère de*  
132 *la Transition écologique et solidaire*) reminds us, the involvement of the population is crucial for  
133 the success of the process as a whole (Courant et al., 2021). There are, however, several  
134 indications that Mayotte's inhabitants have not been satisfied with the way information has been  
135 shared about the current event (see section 3). Although, as we will demonstrate later on, there  
136 has been a persistent effort by risk managers and monitoring experts to share information with  
137 the public. The issue hence arises of understanding what may have led to the reported  
138 "communication crisis". We propose here to compare the information delivered by the main actors  
139 of monitoring and risk management to Mayotte's inhabitants with what is known of at-risk  
140 populations information needs.

141 First, we provide a brief overview of what is known about Mayotte's geological setting and  
142 the ongoing seismo-volcanic activity (section 2). We then relate some elements of the political  
143 and social context that contributed to transform a telluric phenomenon with relatively minor  
144 consequence into a situation of crisis (section 3). The corpus and methodology used in our  
145 analysis are described in Section 4. Section 5 describes the successive stages of organisation of  
146 the monitoring and risk management response. As no emergency planning or monitoring had  
147 been done in the department of Mayotte with respect to volcanic issues before May 2018, the  
148 framing of the official response has evolved significantly over time. Documenting this evolution  
149 was a significant part of our work. It led us to distinguish four main phases (1, 2, 3, 4) that are  
150 presented chronologically in section 5. Because public information strategies have not always  
151 evolved coincidentally with monitoring and risk management frameworks, communication issues  
152 are discussed separately in section 6. Analysis of the volume, timing and content of the written  
153 documents used by authorities and scientists to share information with the public leads us to  
154 distinguish three main phases of communication (A, B, C). In section 7, we discuss our results  
155 and issue recommendations to improve future communication strategies. We believe that the  
156 lessons learnt from the relatively long-lasting case study of Mayotte (3 years), in a relatively  
157 unprecedented context (mostly submarine phenomena, leading to "invisible" risks, whose study  
158 requires significant resources and technical innovation), can usefully nourish the reflection carried  
159 out in the literature about risk communication and, more generally, disaster risk reduction.

## 2. Mayotte's geological setting and what is known today about the ongoing seismo-volcanic activity

Mayotte belongs to the Comoros archipelago, a chain of four main volcanic islands that extends ~E-W between the east African coast and the northern tip of Madagascar (Figure 1). Recent studies link the formation of these islands to an E-W zone of diffuse transtensional right-lateral shear at the immature boundary between the Somalia and Lwandle plates (e.g. Famin et al. 2020, Feuillet et al. 2021, Tzevahirtzian et al. 2021). Following this interpretation, the Comoros volcanism occurs along en échelon NW-SE tensional fractures affecting the lithosphere in a context of NE-SW extension (Famin et al., 2020; Feuillet et al., 2021). The location and genesis of this volcanism would be mostly due to lithospheric deformation (Michon, 2016; Famin et al., 2020; Feuillet et al., 2021; Tzevahirtzian et al., 2021) rather than to an hotspot trail as previously proposed by several authors (e.g. Emerick and Duncan, 1982; Class et al., 2009). Volcanism and formation of the Comoros islands started at least ~10 Ma ago (e.g. Emerick and Duncan, 1982; Michon, 2016). The Karthala volcano in the westernmost island of Grande Comore (Bacheléry et al., 2016) is still active today. It is monitored by the Karthala Observatory of the CNDRS (Centre National de Documentation et de Recherche Scientifique, in Moroni) in collaboration with the Institut de Physique du Globe in Paris and the University of La Réunion. In Mayotte, recent volcanism is documented with eruptive products as young as ~4 ky inland (e.g. Pelleter et al., 2014), and actual at the "new volcanic edifice" (NVE) discovered in May 2018 (Feuillet et al. 2021). Recent analysis of seismic receiver functions by Dofal et al. (2021) points to a thinned continental crust beneath Mayotte with a former continental moho at 17-19km depth, underlined by a 9-10km fast layer interpreted to result from magmatic underplating (Dofal et al., 2021). According to these authors, the magmatic reservoir feeding Mayotte's new volcanic edifice would be located below the interface between the underplated magmatic layer and the underlying mantle lithosphere.

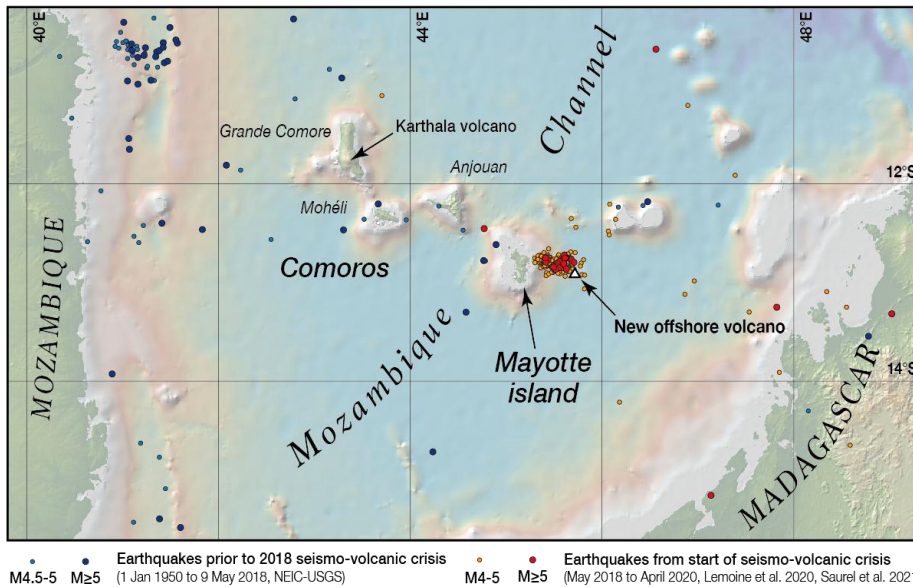

186  
187

188

189

190

191

192

193

194

195

196

197

198

199

200

201

202

203

204

205

206

207

208

209

210

**Figure 1.** Location of Mayotte, easternmost island of the Comoros archipelago. Blue dots: epicenters of seismic events prior to seismic crisis that started on 10 May 2018 (Magnitude  $\geq 4.5$ , Jan. 1950 to 9 May 2018, USGS catalog); Red (magnitude  $\geq 5$ ) and orange ( $4 \leq$  magnitude  $< 5$ ) dots show earthquake epicenters with well-constrained hypocentral depth from 10 May 2018 to April 2020 - locations from Lemoine et al. (2020) between May 2018 and March 2019 and REVOSIMA catalog between April 2019 and April 2020 (Saurel et al., 2021). Most earthquakes of the ongoing seismic crisis as well as the new offshore volcanic edifice discovered in May 2019 (Feuillet et al., 2019, 2021) are located 10-50km east of Mayotte island. To avoid problems with mislocated events on this map we excluded epicenters with 10km fixed depth, and only plotted the ones with well-determined hypocentral depths. Topographic and bathymetric visualisation is from GeoMapApp ([www.geomapapp.org](http://www.geomapapp.org) - CC-BY).

The ongoing activity started on the night of 10 to 11 May 2018 with an earthquake of magnitude ML4.3 felt by the population. Seismicity intensified on 15 May 2018 with several earthquakes of magnitude  $> 4$ , all largely felt, and an event of magnitude ML5.8 (MW 5.9) (Lemoine et al., 2020). Although diminishing over time, seismic activity has continued since and is still active at the time of writing,  $>3.5$  years after its beginning. Prior to May 2018, regional instrumental seismicity near the islands (blue dots in Figure 1) was moderate, with the largest magnitudes recorded between  $M_b$  5 and 5.5.

In May 2018, Mayotte's area was poorly instrumented. The ability to identify and precisely locate the earthquakes improved gradually with the development of the network of seismic stations (Bertil et al., 2021; Saurel et al. 2021). The inclusion of underwater stations (OBS for Ocean Bottom Seismometer) from February 2019 (Feuillet et al., 2021, Saurel et al., 2021), and

211 the use of refined seismic velocity models (Lavayssière et al., 2021; Saurel et al., 2021), were  
212 determinant to this respect. The study of the seismicity since the OBS deployment allowed to  
213 locate two clusters of seismicity: a dense "proximal cluster" located close to Mayotte's eastern  
214 coast, and a "distal cluster" located about 30 to 40km east of the islands extending eastward in  
215 the direction of the new volcanic edifice (Feuillet et al. 2021, Saurel et al. 2021, Lavayssière et al.  
216 2021). According to Lemoine et al. (2020), these two clusters are active since the end of June  
217 2018, while, from May to June 2018, the earthquakes occurred in a more distal cluster, shallower  
218 and closer to the new volcanic edifice. This earlier cluster would have included the large  
219 earthquakes that marked the beginning of the crisis. Distal clusters are interpreted to result from  
220 the fracturation and diking processes that allowed magma migration from the deep magma  
221 chamber to the new volcanic edifice (e.g., Cesca et al., 2020; Lemoine et al., 2020; Feuillet et al.,  
222 2021; Lavayssière et al., 2021). The proximal cluster is composed of deep (~35-50km) seismic  
223 events that might be linked to the deformation induced by a deflating deep reservoir (e.g., Feuillet  
224 et al. 2021, Lavayssière et al. 2021). It also contains less deep events (20-35km) that might be  
225 due to stress perturbations around a shallower (~25km) reservoir, as suggested by the location  
226 of very long period seismic events (Feuillet et al. 2021, Lavayssière et al. 2021). Being close to  
227 the islands, it is this proximal seismic cluster, and the magmatic processes related to it, and their  
228 uncertain evolution, that present the real significant hazard.

229  
230 Inhabitants have mainly experienced the ongoing activity through felt earthquakes. More  
231 than 20 earthquakes with magnitudes 5+ were recorded during the first month of the crisis, from  
232 10 May to mid-June 2018 (Bertil et al., 2021), while ~1900 events with magnitudes >3.5 happened  
233 during the first year (Cesca et al., 2020; Lemoine et al., 2020). About 140 of these earthquakes  
234 were reported as felt by the population in the LastQuake crowdsource-based information app of  
235 the Euro-mediterranean Seismological Center (EMSC-CSEM, 2021). There was a sharp  
236 decrease in the number of felt earthquakes after June 2018, in line with the decrease in the  
237 number of instrumentally recorded earthquakes and of their average magnitude (e.g. Lemoine et  
238 al. 2020, Bertil et al. 2021). EMSC-CSEM catalog reports only ~4 felt events per month until the  
239 end of 2018, and then a moderate recovery in the number of felt events between February and  
240 June 2019 (~9 felt events per month on the average) (the red curve in Figure 3 summarizes this  
241 information).

### 242 3. The social and political context of

### 243 Mayotte's seismo-volcanic "crisis"

244 Geoscientists are accustomed to speaking of seismic-volcanic "crises," although the use  
245 of the term "crisis" is not always relevant to disaster risk management definitions. However, in the  
246 case of Mayotte, the observed activity did indeed give rise, at least in the first months, to a crisis  
247 situation that required the intervention of the authorities in charge of civil protection and crisis  
248 management. We relate here some elements of the political and social context that contributed  
249 to this.



250  
251  
252  
253  
254  
255  
256  
257  
258  
259  
260  
261  
262  
263  
264  
265  
266  
267  
268  
269  
270  
271  
272  
273  
274  
275  
276  
277  
278  
279  
280  
281  
282  
283  
284  
285  
286  
287

- **A vulnerable territory**

Mayotte, which became a French Department in 2011, is a particularly vulnerable territory. It is marked by great poverty and high social inequality (Roinsard, 2014). In a population of 256 000, 77% live under the poverty line and over 30% are unemployed, 48% are foreign (and often undocumented), 30% have no access to clean drinking water, and four in ten live in informal housing (Données 2017 – INSEE, 2021). Mayotte's multiculturalism is a wealth that proves difficult to manage when the situation requires informing the widest possible audience: 95% of the population is Muslim (ministère des Outre-mer, 2016), 45% is from the Comoros (INSEE, 2021), and while French remains the official language, about 37% of the population do not speak it (Données 2017 – INSEE, 2017). Oral culture is the dominant one and the most commonly spoken languages are Shimaore and Shibushi. There is no real integration between the traditional culture of the villages and the more westernized culture of large cities (Lambek, 2018). According to Regnault (2011), "three quarters of the *Mahorais* - rural or, at least, still very attached to their village - live a culture other than the "westernized" culture of the cities" (*trad. by the authors*). The relationship with state authorities is complicated by the island's colonial past, but also by a sense of disappointment among the population, who expected more rapid changes to bring the island up to French standards after departmentalization (Roinsard, 2019). Since 2011, Mayotte has been regularly shaken by social crises. The most recent one, which brought the economy to a standstill for two months in the spring of 2018, was just ending as the first earthquakes began (Roinsard, 2019; Mori, 2021). Lastly, the absence in living memory of seismic and volcanic events in Mayotte meant that part of the inhabitants were relatively naïve about such risks (although people coming from the neighboring Comoros islands may have experienced previous seismic and volcanic crises as four eruptions occurred in 2005, 2006 and 2007, see Morin *et al.*, 2016).

- **A recurring complaint about a lack of information**

The intensity and duration of the initial seismic crisis surprised not only the population but also the authorities and scientists. On 16 May 2018, the director of the scientific institution locally in charge of seismic monitoring (the *Bureau de Recherche Géologique et Minière, BRGM*<sup>2</sup>) qualified the activity as "exceptional beyond anything recorded in Mayotte" (AFP dispatch picked up by many media, e.g. Le Point (2018), 16 May 2018). A few days later, the prefect of Mayotte<sup>3</sup> talked about "an abnormal and persisting activity" (*Le Journal de Mayotte*, 19 May 2018). A month later, in an interview given to the French national press, the director of BRGM Mayotte declared: "Unfortunately, we are in the unknown" (15 June, Le Figaro, 2018b).

Although the earthquakes were of moderate intensity, they affected vulnerable buildings and their multiplication caused the appearance of cracks leading some municipalities to close schools (Sira *et al.*, 2018). Local observers reported strong anxiety among inhabitants, many people leaving their houses to sleep outside (Mori, 2021, Fallou & Bossu, 2019; Fallou *et al.*,

<sup>2</sup> The Bureau de Recherche Géologique et Minière (BRGM) is a public industrial and commercial institution dedicated to geological resources and placed under the joint supervision of the ministries in charge of ecology, research and economy. It is the only expert earth-sciences institution with a local branch in Mayotte. It is in charge of seismic monitoring in the area when the current crisis begins.

<sup>3</sup> In France, each department is governed by a prefect, appointed by the president. The prefect is responsible for risk and crisis management at the departmental level in coordination with the mayors, who are responsible for risk and crisis management in their municipalities.



288 2020; it was also currently reported in our interviews). They also testified of a general feeling of  
 289 confusion linked to the unfamiliar nature of the hazard, and to a lack of information. A group of  
 290 citizens created a Facebook feed called "Signalement tremblement de terre de Mayotte" (STTM),  
 291 aimed at reporting felt events and at sharing experiences. The success of the feed, which soon  
 292 gathered more than 10,000 members (about 4% of the population), attested to the existing thirst  
 293 for information. The posts exchanged at that time show a lack of confidence in the authorities'  
 294 willingness to take charge of the situation: "*Earthquakes that sometimes exceed magnitude 5,*  
 295 *cracks in buildings, fires, landslides, etc.... and no real reaction from the state* apart from  
 296 *information on the magnitude of the tremors already felt.*" (excerpt from STTM Facebook group,  
 297 26 May 2018); "*How much do you want to bet that in a year nothing will have been done? As soon*  
 298 *as the crisis passes we<sup>4</sup> play the watch hoping that the next one will come when we leave the*  
 299 *island. That's how the administration has managed Mayotte for decades.*" (excerpt from STTM  
 300 Facebook group, 27 May 2018). On 5 June 2018, the deputy of Mayotte in the French national  
 301 assembly warned the government against the consequences of a lack of public information  
 302 leading to the spread of "*false information fueled by fantasies that have the effect of increasing*  
 303 *people's anxiety, generating a state of panic and even psychosis*" (Ali, 2018). Eight months later,  
 304 in February 2019, members of the STTM facebook feed published an open letter urging the state,  
 305 local elected representatives and scientists to provide more information about the ongoing activity  
 306 (Picard, 2019). Although this group is not really representative of the sociology or the demography  
 307 of Mayotte's population, it soon became a serious interlocutor for the local authorities, and the  
 308 prefect invited its most visible members to the discussion table in 2019 (Journal de Mayotte, 9  
 309 August, YD, 2019). It remains today one of the public arenas where information about the seismic-  
 310 volcanic crisis is followed with the most attention.

311 It took a whole year between the beginning of the seismic crisis and the official declaration,  
 312 in an interministerial press release dated from 16 May 2019 (*ministère de la Transition écologique*  
 313 *et solidaire, ministère de l'Enseignement supérieur, de la recherche et de l'innovation, ministère*  
 314 *des Outre-mer, ministère de l'Intérieur*, 2019), of the discovery of the new volcanic edifice. The  
 315 event closed a year of questioning about the possible origin of earthquakes. The unexpected  
 316 "*birth of a new volcano*" (BBC - Science in Action, 2019) caused enthusiasm in the national and  
 317 international scientific community, and in the media (e.g., Andrews, 2019; Minassian, 2019; Wei-  
 318 Haas, 2019; Devès et al., 2022). The discovery has been described as "exceptional": first,  
 319 because of the large volume of lavas involved, more than 5 km<sup>3</sup> (Feuillet et al., 2021) -  
 320 corresponding to the largest eruption ever observed with modern techniques (Cesca et al., 2020;  
 321 Feuillet et al., 2021; Thordarson & Self, 1993) - and, second, because of the submarine nature of  
 322 the activity - marking the beginning of an exciting scientific adventure to develop new techniques  
 323 of observation. The local press welcomed this sudden interest in Mayotte's actuality (Devès et al.,  
 324 2022), the volcano being presented as a more positive way of talking about the 101<sup>st</sup> department  
 325 than the usual references to its social misery (*Journal de Mayotte*, 28 May 2018). But "discovering"  
 326 the volcano is insufficient to characterize the associated threats. In this sense, the advance in  
 327 knowledge showed itself to be frustrating for the inhabitants, for the authorities, and for journalists  
 328 alike (Devès et al., 2022). In June 2019, STTM's facebook feed members were still complaining  
 329 about the official communication: "*Say nothing, explain nothing... Can only create confusion...*

a supprimé: (10 to 20% of the population according to official sources, pers. com.)

a supprimé: Whether or not we know what's going on at more than 3,000 meters deep, there are facts that are there.

a supprimé: since the Laki eruption in 1783-1784

<sup>4</sup> "We" refers here to the civil servants coming from metropolitan France to work in the overseas department of Mayotte.

336 *Questions that go around in circles because we don't have the answers! When there is neither*  
 337 *answer nor explanation ... One can only wonder ... Why this? What interest or motivation do they*  
 338 *have in not giving the information ... They would like the population to worry: they couldn't do*  
 339 *better! The sickly inability of administrations to communicate ..."* (excerpt from Facebook group  
 340 STTM, 20 June 2019).

## 341 4. Material and methods

342 The present research is part of a research project entitled MAYVOLCANO dedicated to  
 343 the study of the circulation of knowledge between scientists, risk and crisis management actors,  
 344 the media and the population of Mayotte during the current seismo-volcanic crisis. This paper  
 345 aims at providing a first analytical view of the public information process, and of its potential  
 346 limitations.

347  
 348  
 349 The empirical data for the research presented here were collected between 10 May 2018  
 350 and 1 April 2021, covering more or less the three first years of the ongoing seismo-volcanic  
 351 "crisis". The work was organized in three tasks: 1) documenting and understanding the  
 352 organisation of the monitoring and risk management response and its evolution over time, 2)  
 353 documenting and understanding the organisation of the process of public information and its  
 354 evolution over time, and 3) examining the process of public information with regard to what is  
 355 known of at-risk population information needs. The first two tasks were done in parallel. In the  
 356 following, we describe the empirical data and the methods used to complete each of these tasks.  
 357 The corresponding results are presented in section 5 (task 1), 6 (task 2) and 7 (task 3).

### 358 4.1. Documenting and understanding the organisation of the "official response" and 359 its evolution over time

360  
 361  
 362 Our first task was to capture and understand the organisation of the "official response". By  
 363 "official response", we mean the decisions and actions taken by the local and national authorities  
 364 in charge of risk and crisis management and by the scientific experts in charge of monitoring the  
 365 ongoing seismo-volcanic activity. As emphasized in the introduction, the framing of that response  
 366 evolved significantly over time and it was important to be able to document and describe these  
 367 evolutions before addressing the issue of public information.

368 The methods chosen were participant observation, semi-structured interviews, collection and  
 369 analysis of written archives. The fact that three of the authors worked at the Institut de Physique  
 370 du Globe de Paris (IPGP), which is currently in charge of monitoring the activity, facilitated contact  
 371 with experts. The involvement of the first author in previous research projects associating crisis  
 372 management officials facilitated contact with authorities.

373 Participant observation was done within the framework of a day-to-day cohabitation with  
 374 scientists at IPGP, within the scientific council of the REVOSIMA since February 2020 (when the  
 375 first author was invited to join) and, between January and June 2021, within a working group  
 376 coordinated by the interministerial delegation for major risk reduction in overseas territories (the

**a supprimé:** The announcement of the birth of the volcanological and seismological observation network of Mayotte (REVOSIMA) in June 2019 only partially meets expectations.

#### **a supprimé: 2.1. A two step-methodology combining quantitative and qualitative approaches**

We focus on the first three years of the Mayotte seismic-volcanic crisis, more precisely from 10 May 2018 to 1 April 2021. We build our analysis on the following methodology and datasets.

We searched the archives and in particular the web archives of the scientific and state institutions involved in the monitoring and management of the crisis. We collected and analyzed all the documents made public by the authorities and scientists during these first three years such as press releases, scientific bulletins, news on websites and public notes (table 1). Hereafter, we are citing scientific bulletins and websites as references (including their URL when existing) while authorities' press releases are given in the supplementary dataset (ministerial press releases as well as those from the Préfecture of Mayotte). We also included the academic papers published during our 3 years period of study (Cesca et al., 2020; Famin et al., 2020; Feuillet et al., 2021; Lemoine et al., 2020; Tzevahirtzian et al., 2021). We coded this dataset by date of publication and by publishing institution/author, and quantitatively analysed it to show the time evolution of the publication rate by the different actors of the risk management (see Figure 4). Using the catalog of the felt seismicity provided by EMSC for the period from May 2018 to April 2021 (EMSC-CSEM, 2021), we compare this publication rate to the number of earthquakes felt by Mayotte citizens and its evolution in time (Figure 3, 4). This analysis was made using the R software package. This allows us to quantitatively put the scientist's and authorities' communication effort in perspective with the evolution of the geophysical signal that directly affected the population.

However, to understand people's feeling of a lack of communication and how the communication has been managed by the scientists and authorities as the crisis developed, we also needed more qualitative approaches: i.e. qualitative analysis of the content of the different documents. We thus studied the content of all the documents in the above dataset and the way it has evolved in time. We also aimed to identify the main stages of scientific monitoring and to understand how the circulation and transfer of knowledge has been managed by the different actors. With this objective, we conducted semi-structured interviews with scientists from the main institutions in charge of the geophysical monitoring of the crisis (7 interviews lasting from 1 to 3 hours within BRGM, IPGP, CNRS and REVOSIMA) and with local and national risk managers (6 interviews lasting from 40 minutes to 2 hours within the Préfecture of Mayotte, the DIRMOM, the Ministries of Research, Environment and Interior[MD6]). We asked questions about the actors involved in the monitoring and their role, about the procedures, contents and formats used to exchange between them, with the media and th...

515 Délégation interministérielle aux Risques majeurs en Outre-mer, DIRMOM) who developed a  
516 sensibilisation campaign (using videos) about the seismic and tsunami risks in Mayotte.

517 15 semi-structured interviews were conducted with the persons who were identified as pivotal  
518 to the overall monitoring and risk/crisis management process: 8 with scientists directly involved in  
519 the organisation of monitoring (sometimes at different moments of the crisis), 7 with risk or crisis  
520 managers acting at the local, national or inter ministerial levels. Two of these persons were  
521 interviewed twice, before and after the creation of the REVOSIMA which allowed us to gain a  
522 better insight into the associated changes. Most interviews were conducted via visioconference  
523 because of the restrictions due to the COVID-19 pandemy. During the interviews, we asked  
524 questions about the actors involved in monitoring, risk and crisis management, about their role,  
525 about the procedures, contents and formats used to exchange information, between them, with  
526 the media and the public. We also asked more specific questions about the communication  
527 process (see section 4.2). All interviews were recorded (with the agreement of the interviewees)  
528 and transcribed soon after. The transcriptions were anonymized when used for discussion  
529 between the members of the team (only the first author has access to the original files as she was  
530 the one conducting the interviews). Citations taken from interviews for illustration in the present  
531 paper are anonymized to respect interviewees' confidentiality. We also provide our own English  
532 translation. The interviews were analyzed qualitatively with the aim to understand the organisation  
533 of the official response and its evolution. The chosen method places emphasis on the meaning  
534 rather than the quantification of the materials.

535 Regarding the collection of archives, we collected public press releases, public scientific  
536 bulletins and official reports. Interviewees often spontaneously shared the materials they used to  
537 communicate and the materials on which they based their decision, such as internal notes and  
538 reports. We cite here only the documents that are public.

539  
540 The work carried out on the basis of those data allowed us to identify the main actors to be  
541 considered for studying the process of public information (Figure 2).

#### 542 **INSERT FIGURE 2**

543  
544 Figure 2: Cartography of the actors who played an active role in public information during our period of  
545 study.

546  
547 Two main categories of actors are distinguished according to their function: risk and crisis  
548 management or scientific monitoring.

549 On the risk and crisis management side, the main actors are 1) the *prefecture* of Mayotte,  
550 which is the body representing and implementing government policy at the local level, and 2) the  
551 ministries concerned with risk prevention (*ministère de la Transition écologique et solidaire*), civil  
552 protection (*ministère de l'Intérieur*), research (*ministère de l'Enseignement supérieur, de la*  
553 recherche et de l'innovation), and overseas administration (*ministère des Outre-mer*). The  
554 interministerial level is also to be considered because of the active role played by a temporary  
555 interministerial delegation called DIRMOM (*Délégation interministérielle aux Risques majeurs en*  
556 *Outre-mer*) whose task was to improve coordination between ministries on the topic of major risk  
557 reduction in the French overseas. The delegation was in activity between April 2019 and June  
558 2021. The end of our study period therefore corresponds approximately to the end of the

559 DIRMOM's activity, at the dawn of a possible reorganisation of interministerial coordination on  
 560 major risk management overseas. In the French system, mayors are usually key actors of risk  
 561 and crisis management. But, in the case of the seismo-volcanic crisis of Mayotte, it soon appeared  
 562 that public information was mainly being orchestrated at the departemental and national levels  
 563 (anonymous from interviews conducted in June 2020, April, June and September 2021). The  
 564 explanation that was given to us by interviewees is that the initial crisis overwhelmed the capacity  
 565 of response of local mayors requiring the intervention of the prefecture of Mayotte, with the  
 566 support of the national level.

567 On the monitoring side, the number of actors involved has evolved significantly over time.  
 568 In summary<sup>5</sup>, the Institut de Physique du Globe de Paris (IPGP), the School and Observatory of  
 569 Earth Sciences in relation with the École et observatoire des sciences de la terre / Institut de  
 570 Physique du Globe de Strasbourg (hereafter referred as EOST), the Bureau de Recherche  
 571 Géologique et Minière (BRGM) and the Institut Français de Recherche pour l'Exploitation de la  
 572 Mer (IFREMER) have been directly involved in monitoring, although in different ways over time.  
 573 They are the main partners of the REVOSIMA network. The latter, born in June 2019, is operated  
 574 by the IPGP from its closest observatory of the Indian Ocean region, i.e. the Observatoire

- <sup>5</sup> The Bureau de Recherche Géologique et Minière (BRGM) and the Institut Français de Recherche pour l'Exploitation de la Mer (IFREMER) are public industrial and commercial institutions dedicated to, respectively, georesources and marine resources placed under the joint authority of the Ministries in charge of ecology, research and, respectively, economy or agronomy. The National Institute of Geographic and Forest Information (IGN) is a public administrative establishment placed under the joint authority of the Ministries in charge of ecology and forestry.
- The Institut de Physique du Globe de Paris (IPGP) is an institution for higher education and research in geosciences which is in charge of certified observation services in volcanology, and seismology through its permanent volcanological and seismological observatories like the one in La Réunion island (OVPF for Observatoire Volcanologique du Piton de la Fournaise). It operates the Volcanological and Seismological Monitoring Network of Mayotte (REVOSIMA).
- The School and Observatory of Earth Sciences (EOST) is an institution under the supervisory authority of the University of Strasbourg and the CNRS (French National Center for Scientific Research) in charge of education, research, and observation in Earth Science. The IPGP and EOST equip and maintain global geophysics networks that monitor seismic activity (GEOSCOPE network) around the globe. EOST is sometimes referred to as the Institut de physique du Globe de Strasbourg (IPGS), the two bodies having intimate links. The EOST pilots the BCSF-RéNass, Bureau central sismologique français - Réseau national de surveillance sismique, which is in charge of centralising, archiving and distributing national seismic data. The BCSF-RéNass issues a bulletin after each event and collects public testimonies of felt earthquakes ([www.franceseisme.fr](http://www.franceseisme.fr)). It also provides assistance to the public authorities by sending a task force of seismologists (GIM for Groupe d'intervention macrosismique) to estimate impacts after significant earthquakes in French territories.
- The French National Centre for Scientific Research (CNRS) is an interdisciplinary public research organisation under the administrative supervision of the French Ministry of Higher Education and Research. A significant part of French researchers belong to CNRS and work within laboratories which are placed under the joint authorities of the CNRS and the local university. The National Institute for Universe Sciences from CNRS (INSU) has the mission to develop and coordinate French research in astronomy and Earth sciences, as well as ocean, atmospheric, and space sciences.
- The European-Mediterranean Seismological Centre (EMSC) runs an Earthquake Alert System for potentially damaging earthquakes in the Euro-Mediterranean region. As BCSF-RéNass, EMSC collects testimonies through its Lastquake application (e.g., Bossu et al., 2019). Within the hour following the occurrence of an earthquake, EMSC publishes a web page with its epicentre and magnitude, and the collected testimonies.

575 volcanologique du Piton de la Fournaise (OVPF) in Reunion Island, and with the support of the  
576 antenna of BRGM in Mayotte. The Bureau central sismologique français - Réseau national de  
577 surveillance sismique (BCSF-RéNass), the European-Mediterranean Seismological Centre  
578 (EMSC) and the National Institute of Geographic and Forest Information (IGN) centralise,  
579 distribute or provide data.

#### 580 **4.2. Documenting and understanding the organisation of the process of public** 581 **information and its evolution over time**

582  
583  
584 The ultimate goal of this research being to examine the process of public information, it  
585 required documenting and understanding how the above-mentioned network of actors organized  
586 its “external” communication (Becker et al., 2018) and how it evolved with time. We used the same  
587 methods as those mentioned in section 4.1. In addition to the questions listed earlier, we also  
588 asked the interviewees what were the role of the various actors with respect to public information,  
589 what role they played at an individual scale, what were the most important moments for them with  
590 respect to public information and to give their view on the effectiveness of that information  
591 regarding risk reduction. We also took note of the media most commonly used to share  
592 information with the public and decided to systematically collect the documents that were  
593 available (either online or with the help of the interviewees).

594 We searched the archives and in particular the web archives of the scientific and state  
595 institutions involved in monitoring and risk management. We collected all the written documents.  
596 By the end of our period of study, we had collected 320 items including press releases, scientific  
597 bulletins, news on websites and public notes (Table 1). Hereafter, we are citing scientific bulletins  
598 and websites as references (including their URL when existing) while authorities’ press releases  
599 are given in the supplementary dataset (press releases are typically from the prefecture of  
600 Mayotte but there are also a few press releases from the government and from ministries). We  
601 did not consider the numerous automatic bulletins emitted by REVOSIMA (daily automatic  
602 bulletins are emitted since march 2020), BCSF-RéNass and EMSC but we included the report  
603 published by the BCSF-RéNass’s Groupe d’intervention macrosismique (GIM) and a web article  
604 from the EMSC aiming at providing a global view of the seismic crisis. We also included in our  
605 database the five academic papers (one was a preprint version of a submitted paper) dedicated  
606 to the crisis that were published during our period of study (Cesca et al., 2020; Famin et al., 2020;  
607 Feuillet et al., 2021; Lemoine et al., 2020; Tzevahirtzian et al., 2021) and commented by the press  
608 and/or the members of STTM facebook group. We also took into account the contribution of  
609 individual researchers who issued key analyses at crucial times during the crisis (Briole, 2018).

610 Each item was downloaded, stored in pdf under a specific ID, and then read independently  
611 by 2 to 3 researchers who completed a table with information about format and content.  
612 Disagreements were discussed and solved collectively. We took note of the ID, the date of  
613 publication, the URL (when existing), the publishing authors/institutions, the title, the public it  
614 aimed to, the number of words, the presence or absence of illustrations and the nature of these  
615 illustrations (scientific, local, etc.). We also took note of the main topics covered by the text and  
616 of the list of actors that were mentioned. This dataset was used to quantify the volume and timing  
617 of public information, and to undertake a qualitative analysis of content.

To complete our understanding of the public information process, we also explored Facebook publication feeds when they existed (i.e. for OVPF-IPGP, REVOSIMA and prefecture of Mayotte) but without aiming for exhaustiveness as it was difficult to achieve without adequate tools.

Using the catalog of felt seismicity provided by EMSC (EMSC-CSEM, 2021), we compared the publication rate to the number of earthquakes felt by Mayotte citizens and its evolution in time (Figures 3 and 4). This allowed us to put the scientist's and authorities' communication effort in perspective with the evolution of the geophysical signal that directly affected the population.

#### 4.3. Examining the process of public information with regard to what is known of at-risk population information needs

The combination of these data (archives, interviews, notes of participant observation, written documents used by the actors to share information with the public) provided the basis for examining the public information process with regard to what is known of at-risk populations' information needs. The latter is inferred from the existing literature on risk communication (which is abundant on this particular topic, see section 7), while bearing in mind the social and cultural context of Mayotte.

We also explored STTM's Facebook publication feed but, again, without aiming for exhaustiveness as it was difficult to achieve without adequate tools. Hereafter, we use excerpts from STTM facebook posts to illustrate some of our statements. We anonymised these citations, and provide our own English translation (anonymised French original versions of the facebook posts are given in supplementary dataset).

## 5. The organisation of the “official response” and its evolution

As no emergency planning or monitoring had ever been done in the department of Mayotte with respect to volcanic issues before May 2018, the framing of the official response has evolved significantly over time. Here we provide a description of its gradual organisation. We distinguish four main successive phases (1, 2, 3, 4). The first phase goes from the recording of the first earthquakes to the recording of the first unambiguous signals of a volcanic component. The second phase corresponds to the mobilization of scientists, and funding agencies in relation to ministries, to get the financial means to instrument the area. The third phase runs from the first measurement campaigns to the proof of the volcanic activity which signed the official setting up of the seismo-volcanic monitoring network of REVOSIMA. The fourth phase begins with the official creation of REVOSIMA and ends with our windows of study. Figure 3 summarizes the key events that marked each of these four phases. In addition to the events linked to monitoring, we also discuss some key events in the response of scientists, authorities and inhabitants of Mayotte.

**a supprimé:** Description of the phases of the crisis from a monitoring and risk management perspective. The seismic crisis starts on the night of 10 to 11 May 2018 with an earthquake of magnitude  $M_L$  4.3 being felt by the population. It intensifies on 15 May 2018 with several earthquakes of magnitude  $M_L$  greater than 4 and an earthquake of  $M_L$  5.8 ( $M_W$  5.9) that slightly damages buildings (Lemoine et al., 2020). One month after the beginning of the crisis, 140 earthquakes with magnitudes  $M_L > 4$  have been recorded (Lemoine et al., 2020). For weeks, the people of Mayotte feel several earthquakes a day. During the first month of the crisis, the EMSC catalog (EMSC-CSEM, 2021) reports ~10 to 20 felt earthquakes per week (i.e. seismic events with at least 4 online citizen testimonies, which EMSC call “felt reports”). Mayotte citizens testify largely after earthquakes of the largest magnitudes: EMSC catalog lists ~200 to more than 500 felt reports for each  $M_L > 5$  events that occurred in May and June 2018. Between May 2018 and May 2019, the seismic networks record about 1900 events with  $M_L \geq 3.5$  (Cesca et al., 2020; Lemoine et al., 2020). However, there is a sharp decrease in the number of felt earthquakes after June 2018 (Figure 3), with only ~4 felt events per month until the end of 2018, and then a moderate recovery in the number of felt events between February and June 2019 (~9 felt events per month on the average). The seismic crisis is still ongoing at the time of writing, 3 years after its start.

**a supprimé:** The following description illustrates the role of these different actors and the timing and context of their involvement phase by phase.



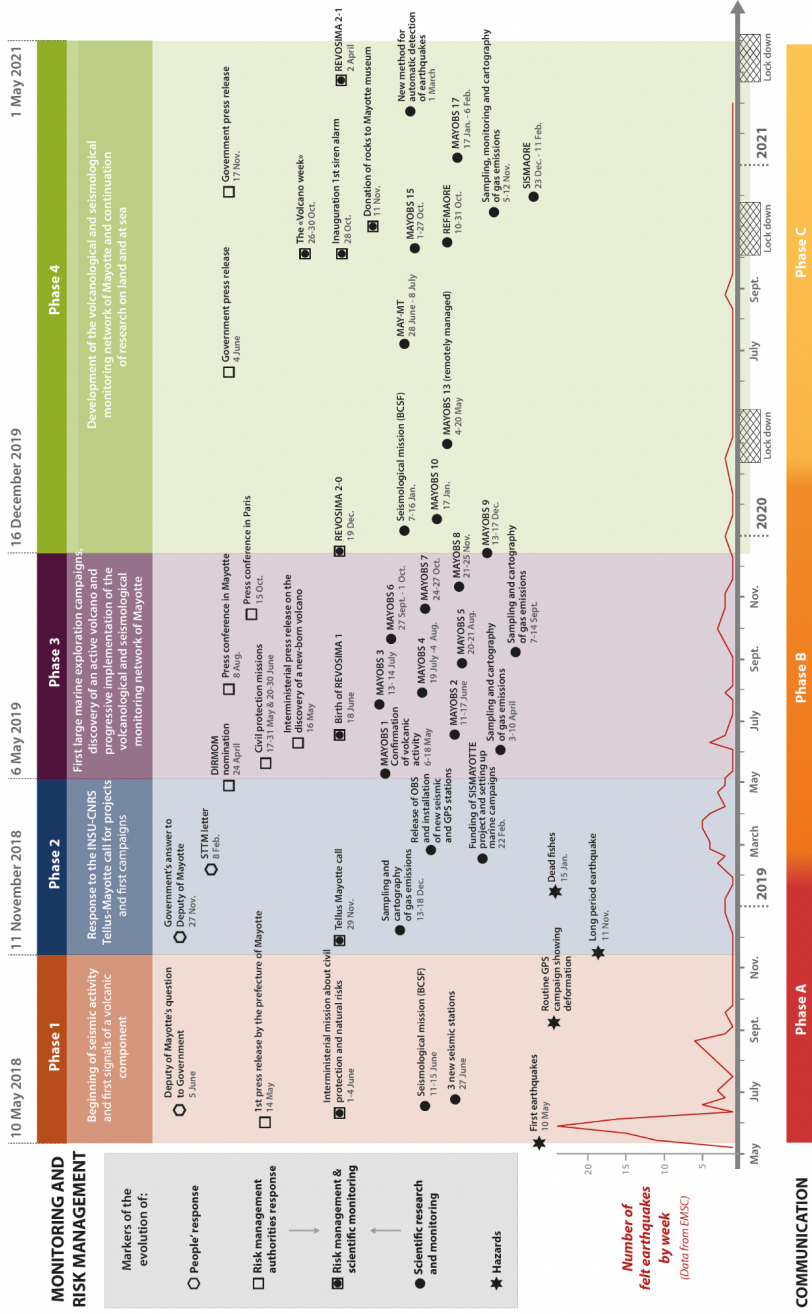



692 **Figure 3:** Major phases and markers of the response by local and national authorities in charge of risk and  
 693 crisis management and by scientific experts in charge of monitoring the seismic-volcanic activity in  
 694 Mayotte. Our period of study extends from 10 May 2018 to 1 April 2021. The lockdown periods that are  
 695 shown are those of metropolitan France (note that most of the scientific institutions involved in  
 696 monitoring are located in metropolitan France). Mayotte endured longer lockdowns in spring 2020 and  
 697 2021 but there was no proper lock down in autumn 2020.

698  
 699 **• Phase 1: 10 May 2018 to 10 November 2018**

700 During the **first phase of the crisis**, the French Geological Bureau (BRGM) played a  
 701 central role. It was the only geo-scientific institution with a permanent office in Mayotte and, at the  
 702 beginning of the seismic crisis, it was in charge of maintaining the only 3 accelerometric seismic  
 703 stations installed on the island (known as moderately active). BRGM Mayotte was hence the  
 704 natural interlocutor of the local and national authorities for decision support. But the situation was,  
 705 difficult as crucial data were missing. Only the largest magnitude earthquakes (M>5) were,  
 706 reported by global seismic networks while the existing local network – the few accelerometric  
 707 stations in Mayotte completed by few regional stations in Comoros and in Madagascar – did not  
 708 allow a good record of the surge of moderate magnitude earthquakes felt by the population.  
 709 Because of this inadequate network, the BRGM operators initially encountered difficulties in  
 710 accurately locating the earthquakes and assessing their epicentral depths (see section 2).

711 In June 2018, the persistence of the seismic crisis led to the involvement of new actors,  
 712 Ministries in charge of civil protection (ministère de l'Intérieur) and disaster risk prevention  
 713 (ministère de la Transition écologique et solidaire) sent an interministerial mission composed of  
 714 civil protection experts and seismologists (e.g., Mayotte la 1ère, 2018; Perzo, 2018b). The experts  
 715 concluded that the impact of the earthquakes mainly resulted in an aggravation of disorders on  
 716 buildings that were already vulnerable (widening, elongation of cracks) and reported that about  
 717 thirty people got minor injuries that were indirectly linked with the earthquakes (e.g. falling down  
 718 stairs to get out of the house). They also outlined that the repetition of shaking had been causing  
 719 a feeling of anxiety and fear among the population, all the more marked as this seismic swarm  
 720 phenomenon was unknown in Mayotte until then<sup>6</sup>. Mid-June 2018, a team of seismologists from  
 721 BCSF-RéNass was sent to “estimate the levels of damage induced by this seismic swarm  
 722 according to the vulnerability of the buildings at the date of the field analysis” (Sira et al., 2018).  
 723 3 more seismic stations were installed (two short-period RaspberryShake velocimeters by the  
 724 BCSF, one broad-band velocimeter in the frame of the ‘Sismo à l'École’ network). During the  
 725 summer, scientists from IPGP and EOST helped the BRGM team to monitor the activity<sup>7</sup>. In July,  
 726 the French scientific community started organising to seek funding to instrument the area, notably  
 727 at sea. A note was sent to the French National Centre for Scientific Research (CNRS) to attract  
 728 funding agencies' attention to Mayotte's issues<sup>8</sup>.

<sup>6</sup> The problem of anxiety was addressed with the opening of a toll-free phone number and a psychological support unit at the local hospital (Press release of the prefecture of Mayotte, 19 June 2018)

<sup>7</sup> Until the creation of REVOSIMA, real-time data processing was organized through the voluntary commitment of scientists.

<sup>8</sup> The issue of funding is not simple. The activity being mostly submarine, surveys have to be done mostly offshore using research vessels and heavy human and technical logistics. The funding to be mobilized is typically of the order of several million euros per year. In parallel, one also has to deal with vessel's availability for their work programs are often planned years in advance. However, several scientists we interviewed claim that the rapid mobilization of fifty

a supprimé: s

a supprimé: is

a supprimé: is

a supprimé: which was not

a supprimé: to be particularly active seismically

a supprimé: In this context, at the beginning of the crisis,

a supprimé: is

a supprimé: It should however be noted that, for BRGM, as for the other scientific organizations involved in monitoring before the creation of REVOSIMA, real-time data processing is organized thanks to scientists' voluntary commitment. ...

a supprimé: is

a supprimé: are

a supprimé: are

a supprimé: does

a supprimé: leads

a supprimé: other

a supprimé: to become involved

a supprimé: d

a supprimé: .of risk and crisis management experts. The arrival of the interministerial mission composed of civil protection experts and seismologists in early June 2018 is an opportunity to take a step back from the situation

a supprimé: is

a mis en forme : Couleur de police : Texte 1

a mis en forme : Couleur de police : Texte 1

a mis en forme : Couleur de police : Texte 1

a supprimé: are

a supprimé: as its intensity decreases

Commenté [2]: A note was added here in response to an external review received by email.

a mis en forme : Police :9 pt, Couleur de police : Automatique

a mis en forme : Police :9 pt, Couleur de police : Automatique

756 In September, routine satellite measurements (using Global Navigation Satellite System,  
 757 GNSS) led by the IGN revealed strong displacement anomalies affecting stations located on the  
 758 island. Researchers from the Ecole Normale Supérieure (ENS) Geoscience Lab. analyzed the  
 759 data, tracing the onset of surface deformation back to July 2018 (Briole, 2018). They explained it  
 760 by the deflation of a huge magmatic chamber located off the coast of Mayotte. The lack of  
 761 geological observations offshore Mayotte was still preventing a good understanding of the  
 762 phenomenon but the scientific community urged public authorities to fund geophysical  
 763 instrumentation and surveys in the region.

764  
 765 • **Phase 2: 11 November 2018 to 5 May 2019**

766 The **second phase of the crisis** started on 11 November 2018 with a long period  
 767 earthquake with peculiar characteristics (a very long trend of monochromatic seismic waves, e.g.,  
 768 Cesca et al. 2020, Lemoine et al. 2020). The event, not felt by the population because of its long  
 769 period character, was recorded by global seismic networks. It was much discussed on social  
 770 networks and appeared to be mentioned in the international and soon national and local press  
 771 (see discussion in Lacassin et al., 2020). It supported the volcanic hypothesis (Cesca et al., 2020;  
 772 Lemoine et al., 2020). Mid-november, a meeting was organised with representatives of the four  
 773 ministries, scientists and scientific institutional stakeholders like CNRS-INSU. On 29 November,  
 774 public authorities set up a call for projects to fund observation and research in the area. The call,  
 775 named "Tellus-Mayotte", was coordinated by the CNRS-INSU and co-financed by the ministry in  
 776 charge of disaster risk prevention (*ministère de la Transition écologique et solidaire*).

777 In January 2019, fishermen reported dead deep sea fishes at the surface of the ocean  
 778 east of Mayotte (Perzo, 2019a)<sup>9</sup>. On 22 January, three projects were eventually selected on the  
 779 Tellus Mayotte call, involving 11 laboratories and 44 scientists from CNRS, IPGP, EOST, BRGM,  
 780 Ifremer and IGN. On 22 February, CNRS, IPGP, BRGM and EOST announced the launch of the  
 781 first major monitoring missions. Between February and March 2019, 6 OBSs were deployed at  
 782 sea in the frame of these Tellus-Mayotte projects, and new seismic and GNSS stations were  
 783 installed on land (by OVPF-IPGP, BRGM, EOST). A team from the University of La Réunion  
 784 associated with OVPF-IPGP carried out field missions to consolidate knowledge of the tectonic  
 785 and volcanic history of Mayotte.

786  
 787 • **Phase 3: 3 May 2019 to 5 December 2019**

788 The **third phase of the crisis** started with the first MAYOBS marine campaigns on the  
 789 scientific ship *Marion Dufresne* (MAYOBS 1 on 6-18 May 2019 and MAYOBS 2 on 11-17 June).  
 790 The campaigns were led under the auspices of the CNRS and involved scientists from BRGM,  
 791 IPGP, EOST, IFREMER, the University Clermont Auvergne, the University of La Rochelle with  
 792 the support of IGN, the national center for space studies (*Centre national d'études spatiales*,  
 793 CNES) and the service hydrographic and oceanographic marine observations (*Service*  
 794 *hydrographique et océanographique de la marine*, SHOM). The OBSs deployed in February were,  
 795 retrieved and new ones were released. The data allowed relocating the earthquakes and

a supprimé: In September 2018, Sseismic activity decreases during the summer and intensifies again in September 2018. The French scientific community starts organising to seek funding to instrument the area, notably at sea. A note is sent to the French National Centre for Scientific Research (CNRS) to attract funding agencies' attention to Mayotte's issues. As surveys have to be done mostly offshore using research vessels and heavy human and technical logistics, the funding to be mobilized is typically of the order of several million euros per year. In parallel, one also have to deal with vessel's availability for their work programs are often planned years in advance. At the same moment,

a supprimé: GNSS,

a supprimé: measurements

a supprimé: Mayotte

a supprimé: GNSS

a supprimé: These results are published in the form of notes on the public website of the laboratory in October 2018 (Briole, 2018).

a supprimé: s

a supprimé: s

a supprimé: starts

a supprimé: is

a supprimé: is

a supprimé: s

a supprimé: s

a supprimé: is

a supprimé: is

a supprimé: are

a supprimé: are

a supprimé: are

a supprimé: s

a supprimé: are

a supprimé: s

a supprimé: are

a supprimé: are

thousand euros in funding would have provided enough knowledge by the end of summer 2018 to confirm the volcanic origin of the seismicity. So there is a debate about the agility of the scientific and administrative governance in organizing the monitoring response as quickly as possible.

<sup>9</sup> It is the first time the existence of dead deep sea fishes were made public.

a mis en forme : Police :9 pt, Couleur de police : Automatique

833 specifying the location of the seismic swarms (Deplus et al., 2019; Feuillet et al., 2019, 2021;  
 834 Jacques et al., 2019; Saurel et al., 2019). Scientists also acquired high-resolution marine  
 835 geophysical data, studied the water column and carried out rock dredging operations on the  
 836 seafloor. An ongoing deep sea volcanic activity was discovered with a new ~800m high  
 837 underwater volcanic edifice, confirming the already suspected volcanic hypothesis. The discovery  
 838 was announced by an official press release signed by four ministries (e.g., *ministère de la*  
 839 *Transition écologique et solidaire, ministère de l'Enseignement supérieur de la recherche et de*  
 840 *l'innovation, ministère des Outre-Mer, ministère de l'Intérieur*, 2019) and relayed by the scientific  
 841 institutions involved in the campaign on their websites.

842 Numerous other marine campaigns followed, allowing to refine progressively the  
 843 understanding of the phenomenon (see Feuillet et al. (2019) to access the MAYOBS campaigns'  
 844 reports). On 18 June 2019, an interministerial meeting set up a scientific and technical committee  
 845 to monitor the activity and officialized the creation of the Volcanological and Seismological  
 846 Monitoring Network of Mayotte (REVOSIMA) with the implementation of "a *monitoring of*  
 847 *volcanological and seismological activity in real time and continuously*" (IPGP, 2019b, published  
 848 on 27 August 2019, translation by the authors). Several phases were envisaged for the  
 849 implementation of this network. In a first phase, the REVOSIMA (called REVOSIMA 1 by the  
 850 actors) was supported by a 2.5 million euros fund in order to establish a monitoring network and  
 851 to guarantee a scientific follow-up of the phenomenon with the implementation of new oceanic  
 852 campaigns aiming at deploying and recovering OBS. The monitoring mission was entrusted to  
 853 the IPGP, already in charge of the other French volcanological and seismic observatories. IPGP  
 854 decided to operate this network through the Observatoire volcanologique du Piton de la Fournaise  
 855 (OVFP-IPGP) in co-responsibility with the BRGM and its regional direction in Mayotte. The  
 856 REVOSIMA's mandate was outlined as follows, to: "i) *monitor the seismo-eruptive dynamics on*  
 857 *land and at sea, in particular in connection with offshore campaigns and underwater*  
 858 *instrumentation to monitor the possible migration of seismicity and volcanism, ii) monitor marine*  
 859 *deformation and submersion, iii) characterize and monitor gravitational instabilities and tsunامي*  
 860 *hazard, iv) improve knowledge of the tectonics and geodynamic context of Mayotte, v) monitor*  
 861 *the geochemistry of volcanic fluids.*" (IPGP, 2019b, published on 27 August 2019, translation by  
 862 the authors). In October 2019, a "pickathon" was organised by the REVOSIMA's scientists in  
 863 order to speed up the process of seismicity relocation.

865 • **Phase 4: 16 December 2019 to 1 April 2021**

866 **The fourth phase of the crisis** corresponds to the progressive development of the  
 867 volcanological and seismological monitoring network which allowed the progress of research on  
 868 land and at sea (there has been more than eight research and monitoring campaigns since  
 869 december 2019). In December 2019, a new interministerial meeting ratified the perpetuation of  
 870 the surveillance network and the release of 4.5 million Euros funding. REVOSIMA 2 was launched  
 871 at the beginning of 2020. In January 2020, seismologists of BCSF-RéNass came back to Mayotte  
 872 to trace the evolution of damages due to the earthquakes from June 2018 and a second pickathon  
 873 was organised to relocate seismicity. From March 2020 onwards, the actors had to deal with  
 874 disruptions due to the international pandemic of COVID-19. A double maritime campaign  
 875 (MAYOBS 13-1, MAYOBS 13-2) was nevertheless organized in May with the support of the  
 876 French Navy. The second campaign was remotely operated by scientists from IFREMER, IPGP,

a supprimé: are

a supprimé: i

a supprimé: ng

a supprimé: ying

a supprimé: carrying

a supprimé: is

a supprimé: o

a supprimé: is

a supprimé: The pPréfecture and vice-rectorate of Mayotte launched a competition among primary ar... [2]

a supprimé: will

a supprimé: that will allowed refining

a supprimé: s

a supprimé: toof crisis monitor

a supprimé: ing

a supprimé: s

a supprimé: are

a supprimé: is

a supprimé: is

a supprimé: operates

a supprimé: is

a supprimé: expected to set up specific scientific a... [3]

a supprimé:

a supprimé: is

a supprimé: geo

a supprimé: of REVOSIMA

a supprimé: of the seismicity

a supprimé: perpetuation

a supprimé: of Mayotte

a supprimé: s

a supprimé: development

a supprimé: new

a supprimé: 8

a supprimé: s

a supprimé: is

a supprimé: o

a supprimé: is

a supprimé: ve

a supprimé: is

a supprimé: mission

a supprimé: is

BRGM and CNRS located in metropolitan France. It was followed, in June, by a magnetotelluric campaign (MAY-MT) and, in October, by a seismic-refraction campaign (REFMAORE), both coordinated by BRGM. The oceanographic campaigns have continued at a steady pace since then, despite the second and third COVID-19 lock downs. The only notable change, at the end of our study period, was the improvement of the automatic earthquake location method announced by REVOSIMA in March 2021.

a supprimé: is

a supprimé: is

## 6. The organisation of the process of public information and its evolution

a supprimé: Analysis of the scientific and official communication ...

Table 1 lists the preferred publication format and the volume of communication issued by the main actors in charge of monitoring and crisis and risk management during our period of study. Figure 4 shows that the number and frequency of publications has varied greatly over time and among actors. Public information was particularly intense during the first six weeks of the crisis and continued with some regularity throughout 2018. The average number of communications per day was 6,8 during the first phase of the crisis (phase 1), compared to 1,3 (phase 2), 1,2 (phase 3) and 1,0 (phase 4) during subsequent phases. Over 90% of all press releases and scientific bulletins issued by authorities and scientists during our period of study are dated from 2018 i.e., during the period qualified by Fallou et al. (2020) as an "information vacuum". This finding deserves an in-depth analysis to understand the discrepancy between the initial high communication rate and the perceived lack of information. Hence, hereafter, we analyze in detail not only the frequency but also the content and modalities of public information and its evolution over time. Three main phases are distinguished (A, B, C) that are discussed in relation to the phases 1, 2, 3, 4 describing the evolution of the monitoring and risk management response (Figures 3 and 4).

a supprimé: The

a supprimé: vary

a supprimé: (Figure 4)

a supprimé: Communication

a supprimé: is

a supprimé: s

a supprimé: is

a supprimé: As mentioned in the introduction, Fallou et al. (2020) show that, during phase 1, at the same time communication rate was very high, the population perceived a lack of information on the part of authorities and scientists.

a supprimé: some

a supprimé: Focussing on the communication of scientists and authorities, t

a supprimé: can be

a supprimé: can be

a supprimé: major

a supprimé: hazard monitoring and risk management

971 **Table 1.** Format and volume of the documents made public by the main actors of scientific monitoring and  
 972 risk and crisis management during our period of study. As discussed in the text, we only count a report and  
 973 a web article for, respectively, the BCSF-RéNass and the EMSC, and not their automatic reports. We do  
 974 not count the automatic bulletins from REVOSIMA. We include the five academic articles dedicated to the  
 975 understanding of the phenomena occurring in Mayotte that were published during our study period.  
 976

|                                     | Scientific bulletins | Press releases | News on website | Public notes | Academic papers | TOTAL      |
|-------------------------------------|----------------------|----------------|-----------------|--------------|-----------------|------------|
| <b><i>Scientific monitoring</i></b> |                      |                |                 |              |                 |            |
| BRGM                                | 104                  |                | 22              |              |                 | <b>126</b> |
| REVOSIMA                            | 40                   | 1              |                 |              |                 | <b>41</b>  |
| IPGP                                |                      | 1              | 15              |              |                 | <b>16</b>  |
| IFREMER                             |                      |                | 10              |              |                 | <b>10</b>  |
| Researchers                         |                      |                |                 | 4            | 5               | <b>9</b>   |
| EOST                                |                      |                | 8               |              |                 | <b>8</b>   |
| CNRS/CNRS-INSU                      |                      | 2              | 1               |              |                 | <b>3</b>   |
| IGN                                 |                      |                | 1               |              |                 | <b>1</b>   |
| EMSC                                |                      |                | 1               |              |                 | <b>1</b>   |
| BCSF-RéNaSS                         | 1                    |                |                 |              |                 | <b>1</b>   |
| <b><i>Risk management</i></b>       |                      |                |                 |              |                 |            |
| Prefecture of Mayotte               |                      | 100            |                 |              |                 | <b>100</b> |
| Ministries/Gouvernement             |                      | 4              |                 |              |                 | <b>4</b>   |
| <b>TOTAL</b>                        | <b>145</b>           | <b>108</b>     | <b>58</b>       | <b>4</b>     | <b>5</b>        | <b>320</b> |

977  
 978  
 979  
 980

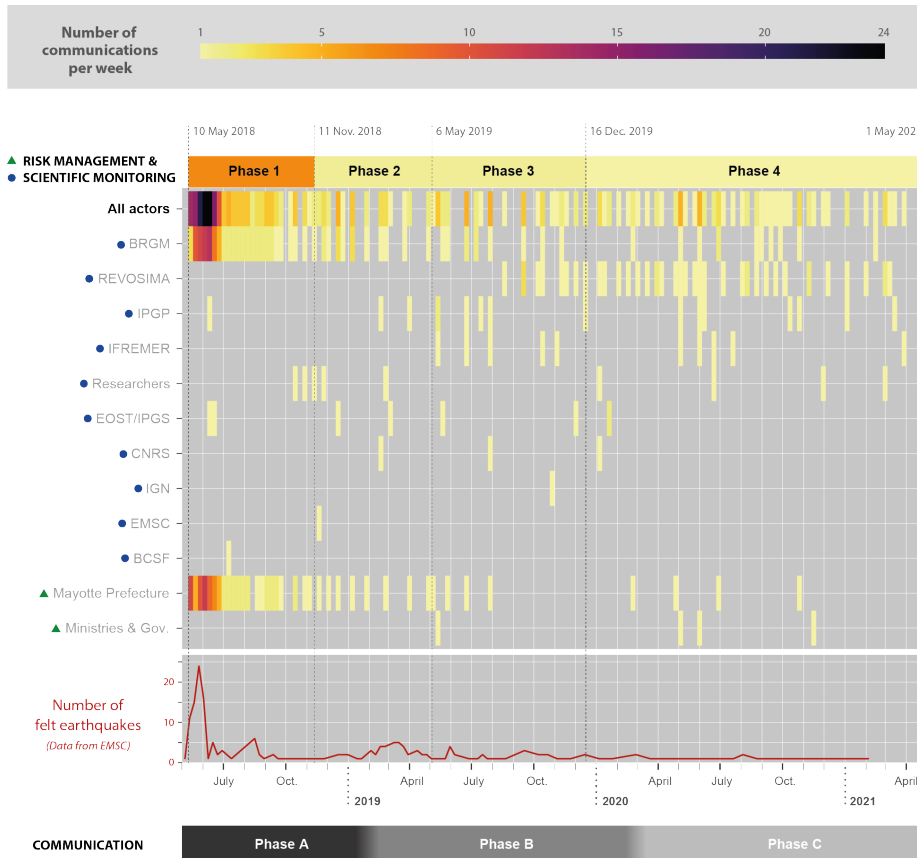

981  
982  
983  
984  
985  
986  
987  
988  
989  
990  
991  
992  
993  
994

**Figure 4.** Number of documents made public per week by the main actors of monitoring and risk and crisis management. The average number of documents published per day is indicated for each of the phases identified in Figure 3.

- **Phase A: from the beginning of the crisis to February 2019**

Between the beginning of the seismic crisis and February 2019, the modalities of communication did not vary much. The local stakeholders in charge of monitoring and risk and crisis management, BRGM and the prefecture of Mayotte, were the main contributors. Other scientific actors, such as the IPGP and the EOST who were, gradually getting involved in monitoring from the first months of the crisis, were, only communicating punctually to report on the geodynamic context of the activity and/or on their involvement in the collect and treatment of data: e.g. on 11 June 2018, EOST announced d the dispatch of the macroseismic response mission

- a supprimé: do
- a supprimé: are
- a supprimé: are
- a supprimé: are
- a supprimé: s



1000 (GIM) to Mayotte (EOST, 2018a); on 12 June, IPGP published an information brief on the ongoing  
1001 crisis in Mayotte (IPGP, 2018).

1003 The first communication to the public was a press release from the prefecture of Mayotte  
1004 on 14 May 2018. Referring to the monitoring undertaken by the BRGM since 10 May 2018, it  
1005 mentioned a "swarm of earthquakes", distinguished it from seismic aftershocks and recalled the  
1006 safety instructions to be followed in case of earthquakes. Three press releases were published  
1007 on 15 May that listed the time and magnitude of felt earthquakes and specified that "all the  
1008 earthquakes took place in the same sector (around 50km off Mayotte) and, although located at  
1009 sea, were too weak to generate a tsunami". Confronted with the repetition of felt earthquakes,  
1010 the prefect of Mayotte activated a crisis unit on 16 May 2018. From then on, the Prefecture  
1011 published press releases on a daily basis (sometimes more) while the BRGM, switching to "crisis  
1012 monitoring", published daily reports<sup>11</sup>. As testified by several interviewees, during that first phase  
1013 of the crisis, the local branch of BRGM was put under strong pressure "to be able to inform, almost  
1014 'day and night', the authorities on the magnitude, on the location of the earthquakes, a more  
1015 precise location than the one announced by the international networks which were not reliable  
1016 because of their distance" (anonymous, interview in May 2020).

1018 During the first weeks of the crisis, the scientific reports and official press releases followed  
1019 one another within a few hours. BRGM published its bulletins on the BRGM website<sup>12</sup>, while the  
1020 prefecture sent press releases to the press and published them on Facebook. These official press  
1021 releases generally reproduced the elements communicated by the BRGM. They remained often  
1022 very technical, recalling the number of earthquakes recorded per day, their magnitude, the time  
1023 at which they were detected and their distance from the island (the reports mentioned  
1024 uncertainties of the order of 10-15 km). The prefecture's press releases could contain additional  
1025 elements about impacts (injuries, building damage) and often recalled safety instructions. They  
1026 also provided information about the decisions taken by the prefecture to support the inhabitants  
1027 of the island (e.g. the setting up of a toll-free phone number and the opening of a psychological  
1028 support unit ; the demand for (and arrival of) a support mission of civil protection and risk  
1029 management in June 2018).

1032 Mid-June 2018, the BRGM published a Frequently Asked Questions (FAQ) on its website  
1033 explaining the state of knowledge and the main uncertainties. But, as written a few months later  
1034 by the ministry in charge of civil protection (ministère de l'Intérieur) in its answer to the deputy of  
1035 Mayotte, "the most inventive explanations have found an echo in part of the population  
1036 (conspiracy, actions of evil spirits, etc.) and communication is proving difficult. The state has  
1037 obviously been concerned about this situation since the beginning of the event, and everything  
1038 possible is being done to inform the population in a reliable manner" (Question à l'assemblée  
1039 nationale n°8992, 27 November 2018, Ali, 2018). Among the incorrect explanations that had  
1040 emerged, a popular one was that the earthquakes were caused by oil exploration off the coast of  
1041 Mayotte (Fallou et al., 2020; Mori, 2021). The hypothesis of a volcanic cause had also surfaced:

- a supprimé: s
- a supprimé: is
- a supprimé: s
- a supprimé: s
- a supprimé: s
- a supprimé: are
- a supprimé: y
- a supprimé: take
- a supprimé: are
- a supprimé: This unusual seismic activity surprises the local experts. In an interview given to the French national press, the director of BRGM Mayotte declared: "Unfortunately, we are in the unknown" (15 June, Le Figaro, 2018b).
- a supprimé: s
- a supprimé: é
- a supprimé: s
- a supprimé: which
- a supprimé: ed
- a supprimé: s
- a supprimé: is
- a supprimé: s
- a supprimé: ds
- a supprimé: s
- a supprimé: expert body
- a supprimé: sometimescan
- a supprimé: with
- a supprimé: natural
- a supprimé: s
- a supprimé: But, despite significant effort from all parties, a careful read shows that the communication of the first weeks was overall marked by a sense of surprise, uncertainty and even sometimes inaccuracy. We do not come back here on the issue of surpris( ... [4])
- a mis en forme : Non Surlignage
- a supprimé: The arrival of the interministerial missi( ... [5])
- a supprimé: s
- a supprimé: in a more educational way
- a supprimé: The attempt was virtuous but not ... [6]
- a supprimé: ve
- a supprimé: is
- a supprimé: awerre
- a supprimé: s
- a mis en forme ... [7]

<sup>11</sup> <https://www.brgm.fr/fr/actualite/dossier-thematique/volcan-seismes-mayotte-brgm-fortement-implique>

<sup>12</sup> *id.*



1148 it was discussed on the websites of national scientific laboratories (EOST, 2018b; IPGP, 2018)  
 1149 and in the local press (e.g., YD, 2018) as early as May-June 2018.

1150

1151 From the end of June 2018, the number of communications decreased d with the decrease  
 1152 in seismic activity (2 BRGM bulletins per week from 29 June 2018). In September 2018, BRGM  
 1153 announced d that "the swarm [was] still running [but that] the lull observed since the end of June  
 1154 [justified] the change from "crisis" monitoring to "routine" monitoring" (bulletin of 17 Sept, BRGM,  
 1155 2018a). From then on, BRGM published d bulletins twice a month, with exceptional bulletins in case  
 1156 of felt earthquakes. In October 2018, analysing the routine GNSS measurements led by the IGN,  
 1157 a geophysicist from the Ecole Normale Supérieure suggested d that the seismicity could be related  
 1158 to the deflation of a deep magma chamber. These results were published in the form of notes on  
 1159 the public website of the laboratory in October, November and December 2018 (Briole, 2018). In  
 1160 the opinion of several scientists we interviewed, the "wild" (sic) publication of his results played  
 1161 an important role in raising awareness of the importance of this seismic crisis among the scientific  
 1162 community, and authorities in charge of risk management. On 7 November 2018, a press release  
 1163 from the prefecture of Mayotte mentioned d that the IGN measured a shift of the island eastward  
 1164 as well as a "slight downward shift". The risk implications were, not specified but it was the first  
 1165 time the volcanological component was, officially mentioned, 6 months after the hypothesis  
 1166 circulated among experts and in the press. The infrasound signal of November 11, 2018, which  
 1167 occurrence supported d the volcanic hypothesis, gave rise to intense discussions among the  
 1168 international scientific community (Lacassin et al., 2020). It was, mentioned by the BRGM in a  
 1169 news item summarizing current knowledge on the understanding of the ongoing activity published  
 1170 on its web site on 17 December 2018 (BRGM, 2018b).

1171 From January 2019, the frequency of BRGM bulletins continued d to decrease to reach a  
 1172 frequency of one bulletin every 20-30 days.

1173

#### 1174 • Phase B: from February 2019 to February 2020

1175 On 8 February 2019, following the initiative of the STTM group of Mayotte, 140 inhabitants  
 1176 of Mayotte signed d an open letter addressed to the prefect of Mayotte, the local administration, the  
 1177 BRGM and the local media. Pressing them for more information (Picard, 2019, on change.org),  
 1178 they wrote: "You are not unaware that, for almost 9 months, a large majority of "your" population  
 1179 has been living in anxiety, incomprehension ... Even anguish! The most "basic" questions in terms  
 1180 of security of people, conduct to hold and even projection in the near future ... Are found without  
 1181 any answer! You are certainly convinced that you are doing the maximum so that the panic does  
 1182 not reach your "constituents"? BUT this is not the reality on the ground." Expectations were,  
 1183 particularly high toward scientists, who were, expected to provide explanations and guidance with  
 1184 respect to risk scenarios. But, in the absence of offshore observations, the scientific advances  
 1185 were, still poor.

1186 February 2019 was, an important tipping point, however, as the scientific community finally  
 1187 received d, the funding to work in the area. On 22 February 2019, CNRS issued d, a press release  
 1188 with the laureates of the Tellus-Mayotte call for tenders (CNRS, 2019). With the launch of the  
 1189 Tellus Mayotte program, communication opened d, up to new scientific actors. IPGP and EOST  
 1190 announced d their involvement in the up-coming missions on their website. BRGM scientists

a supprimé: is

a supprimé: s

a supprimé: s

a supprimé: is

a supprimé: s

a supprimé: s

a supprimé: s

a supprimé: scientists

a supprimé: s

a supprimé: are

a supprimé: is

a supprimé: s

a supprimé: i

a supprimé: is

a supprimé: s

a supprimé: i

a supprimé: are

a supprimé: are

a supprimé: are

a supprimé: is

a supprimé: s

a supprimé: s

a supprimé: s

1214 published the first public catalog of the seismic data collected since the beginning of the crisis  
1215 (Bertil et al., 2018; Lemoine et al., 2019).

1216 BRGM continued to publish a monthly bulletin dedicated to the monitoring of the seismicity  
1217 but communication from the prefecture of Mayotte became more episodic. It focused on relaying  
1218 BRGM's situation points (with the list of events - among which the felt ones - in the past months)  
1219 and on announcing the arrival of Tellus Mayotte scientific campaigns. The volcanic hypothesis  
1220 was eventually put forward in the official communication. The press release of 3 April 2019  
1221 mentioned a "scientific volcanological mission" aiming at "consolidating knowledge of the tectonic  
1222 and volcanic history of Mayotte and at highlighting the tectonic structures of the island by means  
1223 of dating of magmatic rocks, or analyses of the composition of soil gases".

1224 One year after the beginning of the seismic crisis, it was time to take stock of the situation.  
1225 In a press release published on 10 May 2019, the Préfecture of Mayotte reviewed the actions  
1226 undertaken, both from a scientific and risk management point of view, during the past year, and  
1227 concluded that "the latest data collected by the experts and the modeling of the phenomenon  
1228 suggested a volcanic origin, possibly linked to a large-scale underwater eruption, or even to an  
1229 origin combining both tectonic and volcanic phenomena". When the scientists of the MAYOBS  
1230 campaign arrived at the dock on 16 May 2019, they were accompanied with an interministerial  
1231 press release (e.g., *ministère de la Transition écologique et solidaire, ministère de l'Enseignement*  
1232 *supérieur, de la recherche et de l'innovation, ministère des Outre-Mer, ministère de l'Intérieur,*  
1233 2019) announcing the discovery of a newborn volcano at the origin of the abnormal seismicity  
1234 endured by the Mahorais for the past year. The government, through the voice of four of its  
1235 ministries, committed to reinforce monitoring and prevention measures<sup>14</sup>. IPGP relayed the press  
1236 release on its web site on the very same day (IPGP, 2019a), IFREMER, EOST and BRGM  
1237 followed soon after. The announcement was relayed on Twitter, with a spectacular picture of the  
1238 underwater volcanic edifice and the rising plume above it (Lacassin, 2019), which raised the  
1239 interest of international scientists and of media such as National Geographic, Science, or the BBC  
1240 (BBC - Science in Action, 2019; Pease, 2019; Wei-Haas, 2019). The prefecture and vice-rectorate  
1241 of Mayotte launched a competition among primary and secondary schools to name the new-born  
1242 volcano<sup>15</sup>.

1243 There were similar surges of communication after the return of the next marine campaigns  
1244 MAYOBS 2 to 4 in June and July 2019, but much less communication afterwards<sup>16</sup>. The effort of  
1245 communication resumed again in May 2020 after the MAYOBS13 campaign.

1246  
1247 From the discovery of the underwater volcanic activity, the prefecture of Mayotte and the  
1248 BRGM were no longer the only two central actors regarding public information. On 28 May, 2019,

<sup>14</sup> The press release indicates that the government has defined the following action plan: 1) Complete as soon as possible the monitoring system and install the scientific devices that are necessary to continuously monitor the phenomenon; 2) Complete, through appropriate missions, the scientific knowledge; 3) Immediately update the knowledge of the risks presented by this phenomenon and the potential impacts for the territory of Mayotte; 4) Strengthen without delay the planning and preparation for crisis management; 5) Regularly inform the population, in conjunction with local elected officials.

<sup>15</sup> The name chosen for the new volcanic edifice was finally made public in December 2021. It did not match the names originally proposed by the children. It is not possible to explain the reasons for this in this paper, as it would require extending our study period. However, it can be noted that the entire process was not consistent with the need to engage people more actively in the recognition of this new source of hazard.

<sup>16</sup> Reports and press releases following MAYOBS campaigns are listed on this dedicated IPGP web page: <https://www.ipgp.fr/fr/revosima/rapports-communiques-de-presse-missions-mayoobs>

a supprimé: s

a supprimé: o

a supprimé: s

a supprimé: s

a supprimé: It is worth pointing out that t

a supprimé: s

a supprimé: 's

a supprimé: s

a supprimé: s

a supprimé: [now]

a supprimé: are

a supprimé: 4

a supprimé: s

a supprimé: s

a supprimé: is

a supprimé: of

a supprimé: s

a supprimé: are

a supprimé: will

a supprimé: are

a supprimé: risk communication

a mis en forme : Police :9 pt, Couleur de police : Automatique

a mis en forme : Police :9 pt, Couleur de police : Automatique

BRGM published its latest seismic bulletin on its own and the prefecture of Mayotte published its latest press release only dedicated to the seismic crisis. Monitoring failed in the hand of the newly born REVOSIMA. Communication was then discussed at a more centralised level by the DIRMOM who reported directly to the cabinet of the Prime Minister. The prefecture worked closely with the DIRMOM to elaborate new communicational tools such as information leaflets. Early August, the Prefect organized a press conference during which scientists presented the results of the last campaigns to elected officials and local dignitaries.

The creation of the REVOSIMA was eventually announced one year and four months after the start of the seismic "crisis" in the end of August 2019, during a visit from the minister of the Overseas (*Ministre des Outre-mer*) (*Journal de Mayotte*, 27 August 2019). The first web news concerning the creation of REVOSIMA was published on the IPGP website (IPGP, 2019b). Entitled "*Volcanological and Seismological Monitoring Network of Mayotte*", it presented the mandate of the IPGP and its partners in monitoring the seismic-volcanic crisis in Mayotte. REVOSIMA issued its first scientific bulletins at the end of August 2019. Several bulletins were issued approximately at the same time (one bulletin for July and two for August 2019) creating an apparent surge of communication on Figure 4. From then on, two scientific monitoring bulletins were published every month (it was reduced to one per month in March 2020)<sup>17</sup>.

A scientific conference was organized at IPGP in Paris on 15 October 2019. It aimed to present scientific advances, and to discuss the challenges of its future monitoring. It was followed by a public conference and a question-and-answer session in the presence of state representatives and of the media. It was covered by national media, interested by the unprecedented nature of the activity (e.g., Vey, 2019), and the local press, proud to see a local scientist invited (Perzo, 2019b). In October 2019, the Préfecture set up a "stakeholder committee"<sup>18</sup> aimed at bringing together "all the notables, heads of department, politicians, around a table" and to whom scientists would be expected to present, about every six months, "the assessment of the crisis and the scientific findings" (anonymous, interview in May 2020). In November 2019, the prefecture organised public meetings in several municipalities of Mayotte but with a sparse audience (a few tens of people, anonymous, interview in May 2020).

In December 2019, the American Geophysical Union fall meeting hosted a special session dedicated to the Mayotte new volcano discovery where the scientific results from the first MAYOBS campaigns were presented (e.g., Deplus et al., 2019; Feuillet et al., 2019; Jacques et al., 2019; Saurel et al., 2019). From our interviews, we understood that some tensions emerged between the authorities and the scientists about one of the communications (Poulain et al., 2019), which mentioned a delay of a few minutes between a triggering event due to the volcanic activity and the arrival of a tsunami on land. The authorities did not want such information to be communicated without having thought beforehand about the protection measures to be put in place. The decision was taken to not show the poster (interview in June 2020). At the end of 2019, EOST also announced the arrival of the second mission of the BCSF-RéNaSS macro-seismic

**a supprimé:** s...its latest seismic bulletin on its own and the prefecture of Mayotte published...its latest press release only dedicated to the seismic crisis. Monitoring failed...in the hand of the newly born REVOSIMA. Communication was...thennow...discussed at a more centralised level by the DIRMOM who reported...directly to the cabinet of the Prime Minister. The prefecture worked...closely with the DIRMOM to elaborate new communicational tools such as information leaflets. Early August, the Prefect organized...

... [8]

**a supprimé:** is...published on the IPGP website (IPGP, 2019b). Entitled "*Volcanological and Seismological Monitoring Network of Mayotte*", it presented...the mandate of the IPGP and its partners in monitoring the seismic-volcanic crisis in Mayotte. REVOSIMA issued...its first scientific bulletins at the end of August 2019. Several bulletins were issued approximately at the same time (It corresponds to...(one...bulletin for...July 2019...and...the...two bulletins...or August 2019) follow in September...creating an apparent surge of communication on Figure 4. From thennow...on, two scientific monitoring bulletins were...published every month (it waswill be

... [9]

**a supprimé:** is...organized at IPGP in Paris on 15 October 2019. It aimed...to present the obtained scientific advances...results on the ongoing seismic-volcanic crisis... and to discuss the challenges of its future monitoring. It was...followed by a public conference and a question-and-answer session in the presence of state representatives and of the media. It was...covered by national media, interested...which are stoned...by the unprecedented nature of the activity (e.g., Vey, 2019), and the local press, which is...roud to see a local scientist, Said Said Hachim, ...invited (Perzo, 2019b). In October 2019, the Préfecture set up a "stakeholder committee"<sup>18</sup> aimed at bringing that broughtings...together "all the notables, heads of department, politicians, around a table" and to whom scientists would be expected to should...present, about every six months, "the assessment of the crisis and the scientific findings" (anonymous, interview in May 2020). In November 2019, the prefecture organised...public meetings in several communes

... [10]

**a supprimé:** s...a special session dedicated to the Mayotte new volcano discovery where the scientific results from the first MAYOBS campaigns were...presented (e.g., Deplus et al., 2019; Feuillet et al., 2019; Jacques et al., 2019; Saurel et al., 2019). From our interviews, we understood... that some tensions emerged between the authorities and the scientists about one of the communications (Poulain et al., 2019), which mentioned...a delay of a few minutes between a triggering event due to the volcanic activity and the arrival of a tsunami on land. The authorities diddo...not want such information to be communicated without having thought beforehand about the protection measures to be put in place. The decision was taken to not show the poster (interview in June 2020). But the case is quickly closed.¶ At the end of 2019, EOST also announced

... [11]

<sup>17</sup> All REVOSIMA bulletins and reports are listed and accessible from the following IPGP web page: <https://www.ipgp.fr/fr/revosima/actualites-reseau>

<sup>18</sup> According to our interviewees, this committee has not been very active since its creation. One or two meetings were organized

1414 intervention group in Mayotte. The continuation of REVOSIMA decided at the December 2019  
1415 interministerial meeting was not really announced, at least publicly.

1416 In January 2020, a team of French and German researchers, not members of REVOSIMA,  
1417 published in *Nature Geoscience* the first academic paper analysing the evolution in time of the  
1418 seismicity and its relation with the ongoing volcanic activity (Cesca et al., 2020). This paper,  
1419 mostly based on seismic data acquired by worldwide seismic networks, mentioned the discovery  
1420 of the new volcanic edifice, before its publication by the scientists directly involved in the survey  
1421 campaigns and the close monitoring of the activity. The CNRS and the University of Toulouse,  
1422 which hosted the second author of this paper, published a press release in French (CNRS &  
1423 Université de Toulouse III, 2020) bearing a sketch section of the proposed magmatic plumbing  
1424 system, which was commented by the STTM group: "So much questions !!! In particular on the  
1425 position of the magma chamber [...] One or Two? 1 or 2 chambers? The island is moving east,  
1426 towards the supposed chamber near the volcano??? And there's another one just below under  
1427 the doormat on our front door", "Silly question, but does that portend a big disaster for us?"  
1428 (excerpts from STTM Facebook group, 8 Jan 2020)

1429 In January, EOST also announced the results of the GIM mission and of a pickathon  
1430 organized by the REVOSIMA to get help in relocating earthquakes. In February, the BRGM and  
1431 the prefecture of Mayotte announced the future launch of seismic-refraction and magnetotelluric  
1432 surveys (MAY-MT and REFMAROE).

1433  
1434 ● **Phase C: From March 2020 to April 2021**

1435 From the beginning of 2020, with the perpetuation of REVOSIMA, the number of actors  
1436 communicating diminished, REVOSIMA refocused the communication effort. From March 2020,  
1437 the frequency of its scientific bulletins became monthly and automatic bulletins were released  
1438 every day online. The monthly bulletins, consisting of about ten to twenty pages, were particularly  
1439 appreciated by the scientific community because they contained details on scientific hypotheses,  
1440 instruments, methods and results as well as the related uncertainties. Despite a first summary  
1441 page aimed at popularizing the contents of the bulletin, they remained nevertheless difficult for  
1442 the lay public to access as it was testified of by discussions within the STTM group: "Gee.... a  
1443 REVOSIMA bulletin of 21 pages, we didn't expect so much....I don't understand everything, so I  
1444 count on THE scientists to tell me if there is something new...", and in response, "Sorry but I can't  
1445 stand these bulletins anymore! I force myself to read them ? Why : 89 % of repetitions and  
1446 reminders of the facts ... I haven't read this one yet (the 25th) ! I think that the objective is reached  
1447 ! To make the "average" readers like us run away ! Impossible a short, sharp and clear bulletin  
1448 ??? Saying : "since the last time..." (excerpts from STTM Facebook group, 5 Jan 2021) and again,  
1449 "Silly question, but does it mean a big disaster for us? I have no knowledge on this subject..."  
1450 (excerpt from STTM Facebook group, 8 Jan 2021). Shorter exceptional bulletins were issued in  
1451 case of felt earthquakes. REVOSIMA monthly and daily bulletins and exceptional press releases  
1452 (in case of felt earthquake) were the main supports for information until the end of our period of  
1453 study. They were made accessible to the public on a dedicated facebook feed and were regularly  
1454 commented on, in the STTM facebook group as well as in the local press. The prefecture  
1455 continued to inform the population about new scientific campaigns.

1456 The COVID 19 pandemics, the related lockdowns and travel restrictions complicated the  
1457 scientific survey of the crisis. A part of it had to be remotely managed, including the MayOBS13-

a supprimé: is

a supprimé: s

a supprimé: time

a supprimé: s

a supprimé: o

a supprimé: s

a supprimé: s

a supprimé: is

a supprimé: largely

a supprimé: s

a supprimé: s

a supprimé: s

a supprimé: o

a supprimé: s

a supprimé: are

a supprimé: are

a supprimé: the monthly bulletin

a supprimé: s

a supprimé: is

a supprimé: .

a supprimé: are

a supprimé: are

a supprimé: are

a supprimé: are

a supprimé: s

a supprimé: s



1484 2 bathymetric survey in May 2020, operated by a commercial survey vessel while the scientific  
 1485 team worked on it from their homes. The objectives of these missions were announced by a press  
 1486 release from the Préfecture of Mayotte (2 May 2020) relayed on the websites of REVOSIMA  
 1487 partner institutions (IPGP, IFREMER, BRGM). The information was backed up by a governmental  
 1488 press release (6 May 2020) which recalled "the state's permanent commitment to protecting the  
 1489 population of Mayotte" and stated d that, as such, REVOSIMA "[continued] to carry out its land and  
 1490 sea monitoring missions, including in the current health context, with all due precautions". Two  
 1491 information leaflets were also issued that described d the release and recovery of OBS (MAYOBS  
 1492 13-1) and the acquisition of underwater acoustic data (MAYOBS 13-2). While surprisingly, no  
 1493 press release followed the MayOBS 5 to 12 missions, REVOSIMA issued d in May 2020 a detailed  
 1494 report about MayOBS13 results (REVOSIMA, 2020), which was relayed on the websites of  
 1495 partner institutions (IPGP, BRGM, IFREMER) on 4 June 2020. The same day, the government  
 1496 published d a press release summarizing g the main scientific results and thanking g all the staff for  
 1497 their commitment in these missions.

1498 Two more scientific papers were published in June 2020, one on the volcanological and  
 1499 seismotectonic context of the seismo-volcanic crisis (Famin et al., 2020), the other one, led by  
 1500 BRGM scientists, analysed d the seismic and GNSS data from the first year (2018-2019) of the  
 1501 seismo-volcanic episode (Lemoine et al., 2020). A preprint preliminary version of the latter was  
 1502 publicly available in February 2019 (Lemoine et al., 2019).

1503 The following months were marked by more scattered communications from the  
 1504 REVOSIMA partner institutions (in addition to the monthly REVOSIMA bulletin), aiming to  
 1505 summarize the knowledge acquired since the beginning of the crisis (e.g. "two years of seismic  
 1506 crisis and the birth of an underwater volcano in Mayotte", August 25th, Paquet, 2020). There was  
 1507 a new surge of communication in October 2020 with the preparation of the MAYOBS-15  
 1508 campaign. IPGP presented ed the campaign's objectives on its website on 13 October, 2020 and  
 1509 published d a preliminary assessment of the mission on 29 October (IPGP, 2020). The prefecture  
 1510 of Mayotte issued d a press release presenting MAYOBS-15 results on 28 October. Some of the  
 1511 scientists of the campaign remained ed in Mayotte to participate in the "volcano week". Organized  
 1512 by the prefecture of Mayotte, in close collaboration with the DIRMOM and REVOSIMA, this  
 1513 "volcano week" aimed d to raise awareness of the volcano among the inhabitants of Mayotte. Local  
 1514 personalities and scientists took turns talking about the ongoing telluric crisis. The scientists  
 1515 presented ed their understanding of the ongoing volcanic activity without dwelling on the possible  
 1516 scenarios. Only the tsunami risk was presented in some detail. Alternative scenarios were shared  
 1517 to the public recalling that a working group was already working to identify possible evacuation  
 1518 routes and that a program had ed been launched to work on a network of sirens and, in the longer  
 1519 term, a mass alert system by telephone operators. But the information shared during that week  
 1520 remained ed quite light on the overall topic of risks and the reactions posted live on the facebook  
 1521 feed of the prefecture during the presentations were pretty skeptical. The tsunami risk was  
 1522 commented in the local press as being eventually "quite limited" (Journal de Mayotte, 2  
 1523 November, YD, 2020). Two presentations by scientists from REVOSIMA were also organized by  
 1524 the education authority for high school students and 160 science teachers in Mayotte. During the  
 1525 same week, the prefect of Mayotte inaugurated d the first tsunami warning siren in Dembeni and  
 1526 scientists symbolically handed ed over volcanic rocks to the Museum of Mayotte. The government

- a supprimé: are
- a supprimé: is
- a supprimé: s
- a supprimé: s
- a supprimé: s
- a supprimé: are
- a supprimé: ,
- a supprimé: s
- a supprimé: is
- a supprimé: s
- a supprimé: that
- a supprimé: es
- a supprimé: s
- a supprimé: are
- a supprimé: s
- a supprimé: It should be noted that a
- a supprimé: are
- a supprimé: is
- a supprimé: s
- a supprimé: take
- a supprimé: is
- a supprimé: are
- a supprimé: is
- a supprimé: s
- a supprimé: s
- a supprimé: are
- a supprimé: will be
- a supprimé: are
- a supprimé: s

1560 issued a press release on 17 November 2020 that reviewed the results of the MAYOBS-15  
 1561 campaign and the outputs of the "Volcano Week."  
 1562

1563 In January 2021, IPGP announced to be the laureate of a major instrumentation project in  
 1564 Mayotte (Programme Investissement d'Avenir 3, MARMOR project). Led by IFREMER, the  
 1565 project brings together the core partners of REVOSIMA and prefigures a restructuring of the  
 1566 governance of research and observation in the region. This change in governance will be all the  
 1567 more important in the months to come as the DIRMOM's mission ended at the beginning of May  
 1568 2021, leaving room for a reorganisation within the state services themselves. This reorganisation  
 1569 is underway at the time of writing and is therefore beyond the scope of this paper. However, it is  
 1570 interesting to note that our study period, which covers the first three years of the crisis,  
 1571 corresponds to the first major stage of volcanic risk management in Mayotte.  
 1572

1573 In March 2021, the researchers involved in the first MAYOBS campaigns and in  
 1574 REVOSIMA publicly released a preprint of their paper submitted to Nature Geoscience (Feuillet  
 1575 et al., 2021). This paper was initially submitted to Nature in September 2019, then transferred to  
 1576 Nature Geoscience in June 2020, but remained confidential until March 2021. It was still under  
 1577 review after revision at the time of writing. The preprint described the new offshore volcano and  
 1578 its activity, the evolution of the crisis from the initial deep fracturation processes to the upward  
 1579 migration of magma across the lithosphere, and discussed the geodynamic context, but did not  
 1580 discuss future scenarios of evolution and related hazards. Local press summarized its main  
 1581 results using a lithospheric-scale cross-section from the preprint that illustrated the processes at  
 1582 work and the location of the seismicity and of magma chambers (YD, 2021). On 15 March 2021,  
 1583 the online media from the *Cité des Sciences et de l'Industrie* (a science museum in Paris)  
 1584 published a webdoc summarizing in a popularized way all main results obtained so far on the  
 1585 Mayotte seismo-volcanic crisis (Minassian, 2021), providing a whole set of new visuals on the  
 1586 activity. Until then, according to the journalists we interviewed, the coverage of the event was  
 1587 indeed made very hard by the absence of direct images of the activity. Two main types of images  
 1588 were used in the official communication as well as in the media: pictures showing oceanographic  
 1589 vessels or a group of scientists at work and the image showing an underwater plume above the  
 1590 new volcanic edifice that was made during the first MAYOBS campaigns (Lacassin, 2019 ; Feuillet  
 1591 et al., 2021).

1592

a supprimé: s

a supprimé: s

a supprimé: s

a supprimé: be laureate

a supprimé: ends

a supprimé: is

a supprimé: s

a supprimé: s

a supprimé: does

a supprimé: s

a supprimé: s

a mis en forme : Police :Italique

a supprimé: s

a supprimé: We added a few sentences about that in the text.

## 7. Examining the potential limits of the process of public information with regard to what is known of at-risk populations' information needs

The previous sections aimed at documenting and understanding the organisation and evolution in time of the official response (section 5) and, more specifically, of the process of public information (section 6). We showed that the communication strategy adopted by the local and national authorities in charge of risk and crisis management and by the scientists in charge of monitoring became more structured and more centralised from the summer 2019, with the establishment of a dedicated monitoring body (REVOSIMA) and the support of an interministerial delegation dedicated to major risk reduction in overseas territories (*Délégation interministérielle aux Risques majeurs en Outre-mer*, DIRMOM). We also showed that the number and frequency of public communications had been significant over time, testifying of a constant commitment of these actors to, first, understand and monitor the crisis and, second, communicate their progress publicly. The question that arises then is: how to explain the reported perception of a lack of information among the population? (see sections 3 and 6; Fallou et al., 2020; Devès et al., under review)? Here we attempt to answer that question by comparing what we learnt about the public information process in Mayotte with what is known, in the literature, of at-risk populations' needs.

The question of at-risk populations' information needs has nourished disaster research for more than 40 years. Excellent summaries of this research exist (e.g. Drabek, 1986; Mileti and Sorensen, 1990; Tierney, Lindell and Perry, 2001). Many studies have focussed on how people process and respond to risk communications in emergencies, but the lessons learnt also apply to emergency preparedness efforts - which is the current issue in Mayotte. Lindell et al. (2006) provide a practical summary of what should be known by practitioners in order to design a successful communication strategy. They insist on the fact that people must, first, receive information, second, heed available information (i.e. pay attention to it) and, third, comprehend the information. They broke down information processing into eight stages corresponding to a few typical questions that people ask before making decisions. We summarize these questions below while indicating in brackets the expected outcomes to progress toward protective actions: 1) Is there a real threat that requires my attention? (expected outcome: threat belief), 2) Do I need to take protection action? (protection motivation), 3) What can I do to achieve protection? (decision set), 4) What is the best method of protection? (adaptive plan), 5) Do I need to take protective action now? (threat response), 6) What information do I need to answer my questions? (identified information need), 7) Where and how can I obtain this information (information search plan), 8) Do I need the information now? (decision information). These questions can all be found, in one form or another, on the STTM Facebook publication feed in Mayotte. The people who write on that feed have received information about the activity (they were warned by felt earthquakes and received messages from authorities, the media or peers). However, as Fallou et al. (2020) point out, they complain that the information they receive does not allow them to understand the exact

**a supprimé:** Overcoming the gap between risk actors and populations: the role of scientific explanation and risk scenarios

**a supprimé:** The previous analysis, based on a quasi exhaustive documentation, shows that

**a supprimé:** of

**a supprimé:** has

**a supprimé:** o

**a supprimé:** with a

**a supprimé:** Before and after

**a supprimé:** a care

**a supprimé:** complain about

**a supprimé:** when, objectively, the volume of documents made public by the main risk actors is significant, corresponding to a real effort to communicate on their part

**a supprimé:** This section aims at allowing drawing a few lessons by comparing what we learnt on the public information process with what is known of at-risk populations' needs. Our ultimate goal is to, which could help to improve future communication strategies. The question that arises is: why does the population of Mayotte complain about a lack of information when, objectively, the volume of documents made public by the main risk actors is significant, corresponding to a real effort to communicate on their part? We

**a supprimé:** by taking into account the specific issues at stake in each of the four scientific monitoring phases 1, 2, 3 and 4, the adaptation of the communication strategies between phases A, B and C and the evolution of the population's information needs.



1678 nature and extent of the threat, and hence to make decisions to prepare or adapt to the associated  
 1679 risks. Of course, the large uncertainties existing about the activity itself have affected the ability  
 1680 of authorities and scientists to meet these expectations. But, as we will now see, the public  
 1681 information strategy that has developed over time has not avoided some well-known pitfalls of  
 1682 risk communication that would benefit from being corrected in the future.

1683  
 1684 ~~Discussions revolve a lot around scientific knowledge and uncertainties. They are informed~~  
 1685 ~~by publicly available scientific knowledge, in the form of official releases from local authorities,~~  
 1686 ~~scientific reports from institutions involved in monitoring, and more generally anything that can be~~  
 1687 ~~found on the Internet. Fallou et al. (2020) point to the absence of a professional scientist who can~~  
 1688 ~~help the group to translate and contextualize such information. "The schools for example, which~~  
 1689 ~~accommodate some 80,000 students, have been checked by experts (I hope everywhere in~~  
 1690 ~~Mayotte) but there has not yet been any feedback to the general public. [...] I would like, for~~  
 1691 ~~example, in the general interest, that according to such and such a structure, we could say to~~  
 1692 ~~what extent it will resist to such and such a magnitude (including site effects and other local~~  
 1693 ~~variables) and also how it will resist to the succession of moderate tremors (in swarm, which is~~  
 1694 ~~obviously our case)" (excerpt from STTM Facebook group, 27 May 2018).~~

1695  
 1696  
 1697 Before to go further, it is important to recall that the inhabitants of Mayotte perceive the  
 1698 existence of offshore volcanic activity only indirectly, mainly through felt earthquakes and,  
 1699 secondarily, through stories told on social media and in the press or reported, for instance, by  
 1700 fishermen who observe dead fishes coming up from deep seas. Numerous studies have shown  
 1701 that experiencing the effects of a hazard increases the attention paid to information about that  
 1702 hazard (e.g., Sorensen, 2000). From this point of view, it seems reasonable to consider that the  
 1703 thirst for information of the inhabitants of Mayotte has also evolved during the crisis, in response  
 1704 to the evolution of the seismicity (Figure 3). The beginning of the crisis was marked by repeated  
 1705 and strongly felt earthquakes, which goes hand in hand with a strong demand for information  
 1706 (Fallou et al., 2020). This interest in the topic of earthquakes is further evidenced by a peak in the  
 1707 number of articles published in the local press at the beginning of the crisis (Devès et al., 2021).  
 1708 The number of felt earthquakes decreased thereafter and so did interest in earthquake-related  
 1709 news. This is shown by a significant drop in the number of articles in the local press. Inhabitants  
 1710 of Mayotte report that, today, the risks associated with the seismic or volcanic activity are barely  
 1711 mentioned in everyday discussions (anonymous, interview in November 2021). Indeed, people  
 1712 are exposed to a variety of risks, some of which are more immediate than those associated with  
 1713 the seismic-volcanic crisis: financial insecurity, energy insecurity, risk of being expelled from the  
 1714 country, daily struggle for access to water, food, and among the natural hazards, flooding, which  
 1715 is far more frequent.

1716  
 1717  
 1718

a supprimé: ¶  
**75.1. Two factors determining the evolution of population's need for information¶**

a supprimé: In the case of Mayotte, the evolution of the population's need for information seems to be a modulation of two main factors: 1) a need for "basic" information that is typical of all populations at risk and well known to disaster studies (see for instance Lindell et al., 2006; Mileti, 1993), and 2) a need for information that adapts to the level of perceived danger, i.e. to the evolution of the hazard.

a mis en forme : Couleur de police : Automatique, Non Barré

a supprimé: **75.2. The role of the evolving available information content¶**

¶  
 The need for information also changes according to the content of the information that is disseminated. Regarding this issue, we have identified three main phases of communication (A, B, C).

### 7.1. The technicalist bias

The public communication is overall characterized by a frequent but minimalist and technicalist discourse. This was particularly true from the beginning of the seismic crisis in May 2018 to the launch of the first scientific campaigns in February/March 2019 (phase A). As expressed on STTM Facebook feed, lists of earthquakes with magnitude and location do not really help people understand the nature or the extent of the threat nor the uncertainties linked to its possible evolution (see section 3, excerpt from STTM Facebook group, 26 May 2018). The frequent use, by scientists as well as by authorities, of specialist terms such as "risk", "seismic constellation", "magnitude", "intensity", etc. is another difficulty for those who receive that information. Devès et al. (under review) show that such terms are reproduced in local newspapers without definition or explanation of context. Among the scientists we interviewed, most argue that "it's not worth worrying people about things that are still hypothetical so [given the uncertainties] we chose to remain very factual" (anonymous, interview in May 2020). But did this "factual" communication allowed people to understand "the big picture", i.e. what was happening and what could happen next? We tend to believe that it added confusion by delaying the sharing of robust information. The fact that the Préfecture mentioned the volcanic hypothesis 6 months after the local press undoubtedly contributed to the population's feeling of a lack of information, and also facilitated the emergence of complotism. The technicalist and minimalist tone adopted in official communications was also at odds with the statements that were made by scientists and authorities who insisted on the unprecedented and de facto very uncertain nature of the activity (e.g. the press release of 3 June 2018 stating that "seismic activity remains abnormal and continues").

A final example can be given for illustration here. As reported by Fallou et al. (2020), the fact that some of the felt earthquakes were not reported in scientific bulletins fueled a sense of distrust among the population. Scientists in charge of monitoring took care to publish a note explaining the limitations of the seismic network and the difference with international networks (22 May, BRGM, 2018a). This note was reproduced in part in the local press (e.g. Le Journal de Mayotte, 23 May 2018). But the efforts made to explain instrumental uncertainties were challenged by the technicity of the note, hardly translated by the journalists who copied and pasted whole sections of the text (Devès et al., under review). Experts' efforts were also challenged by the publication of real-time data, albeit of lower quality, by web applications accessible to all. The prefecture tried to bridge the gap by communicating immediately after earthquakes of magnitude greater than 5 using the data issued by international networks while recalling that "the estimates of international measurement centers were relayed [...] [waiting for] the BRGM to refine its results" and that the latter would be "more accurate because the sensors [were] located in Mayotte and in the area" (Press release, 5 June 2018). Although this strategy seems legitimate from a scientific point of view, one can wonder if it really helped people to better understand the nature of the existing uncertainties. Indeed, it may seem paradoxical to say that the data is of poor quality when it is de facto used in official communication without waiting to be improved.

a mis en forme : Titre 2

a supprimé: 5.2

a supprimé: biais

a supprimé: From the beginning of the seismic crisis in May 2018 to the launch of the first scientific campaigns in February/March 2019 (phase A), t

a supprimé: The effect of surprise, and the lack of proper instrumentation to monitor and understand the seismic crisis, creates a context of strong uncertainties that leads to some confusion. We already illustrated that point earlier.

a supprimé: are

a supprimé: s

a supprimé: take

a supprimé: are

a supprimé: s

a supprimé: are

a supprimé: will

a supprimé: are

a supprimé: , did not make it easier

a supprimé: tends to make it even more difficult

a supprimé: data

a supprimé: they are

## 7.2. The reassuring bias

We showed that, beyond the fact that it remained essentially focussed on the seismic hazard, the first phase of communication was marked by the propensity of the various actors of the risk chain (the authorities, but also the scientists and the local press) to try "reassuring" the population in order to "avoid panic". The local *Journal de Mayotte* reported that "the mayor of Mamoudzou [was] calling people to calm down and not to give in to any form of panic" (Journal of Mayotte, 23 May, Perzo, 2018a). Coming back onto that stage of the crisis, a scientist explains: "At the beginning, we talked a lot about the seismic risk to minimize it in the sense that these were only moderate earthquakes, 5.8 was the larger and afterwards we stayed on moderate earthquakes, we communicated quite a lot saying that to have a lot of damage it was necessary to have high enough magnitudes, that it was, maybe, not in the functioning of the system that we knew" (anonymous scientist, interview in June 2020). After a public press briefing with civil protection experts and seismologists (Perzo, 2018b), the prefecture posted on Facebook and Twitter that "there will be no earthquake of a higher magnitude than what we have already known". And thus, in the local press, one could read that "Mayotte [was] indeed in a seismic zone, but the tremors [were] not of a nature to worry the scientists" (Journal de Mayotte, 2 June, Perzo, 2018b).

This attempt to reassure the public by emphasizing the moderate intensity of the threat had negative side effects when it came to talking about the tsunami threat. The first public scientific bulletin, published on 16 May 2018, indicated that "in all rigor and given the limited knowledge in the region, a tremor of magnitude greater than those already observed [could not] be excluded" and outlined that "these earthquakes [did] not produce damage and, although at sea, [were] too weak to generate tsunamis" (bulletin of 16 May, BRGM, 2018a). This was taken up word for word by the officials and the Minister responsible for the administration of overseas territories declared the same day that "there [was] no risk of damage on land, nor a tsunami at sea" (quote from the *Ministre des Outre-mer* in *L'express de Madagascar*, 16 May 2018). A few days later, one could read in national newspapers that: "there [were] no risk of subduction, therefore there [were] no risk of a tsunami", although "emergency teams [were] ready to be dispatched from Paris and from Reunion Island where tents and medication [were] stocked", the journalist outlining that "the watchword [was] to reassure the population." (Le Figaro, 21 May 2018). This press excerpt outlines the paradox of a communication that adopts the tone of certainty ("there is no risk") and, at the same time, recognizes implicitly the existence of unknowns (emergency teams are still making ready!). And, a year later, tsunami risk reduction became one of the priorities of risk management authorities focussing part of the latest communication efforts<sup>19</sup>.

Communication in the context of large uncertainties has proven to be challenging as contradictions cannot fail to emerge when awareness about the situation becomes more precise. Devès et al., (under review) point out that news accounts, because of the way they are constructed (by juxtaposition of remarks made by different actors) tend to highlight these contradictions. Nevertheless, it remains crucial that authorities and scientists express themselves promptly so as not to allow space for rumor to gather (see Fallou et al., 2020 on Mayotte's case;

a mis en forme : Titre 2

a supprimé: 5

a supprimé: 2.

a supprimé: B

a supprimé: s

a supprimé: is

a supprimé: s

a supprimé: is

a supprimé:

<sup>19</sup> The tsunami is one of the first hazards to have given rise to a precise assessment and to the development of concrete preparedness measures (installation of new sirens, definition of evacuation trajectories). Tsunami risk reduction is at the heart of the prevention campaign organized by the DIRMOM in 2021 with videos explaining how to evacuate to higher ground.

1848 [Lagadec, 1993](#) or [Scanlon, 2007](#) for general views on the topic). The pitfall here lies in the  
 1849 willingness, often shared by all the actors (authorities, scientists, and in the case of Mayotte even  
 1850 local journalists as shown by [Devès et al., under review](#)), to “reassure” a supposedly “panicked”  
 1851 and “irrational” population<sup>20</sup>. This desire to reassure the population in order to avoid disturbances  
 1852 of public order is not specific to the case of Mayotte. It has led risk managers' decision making in  
 1853 many other crises – a famous case is that of Katrina in the United States (Rodriguez, Trainor and  
 1854 Quarantelli, 2006) but examples were also discussed in France (e.g., [Borraz, 2019](#)) and about  
 1855 telluric phenomena such as earthquake sequences (e.g., [L'Aquila, see discussion in Cocco et al.,](#)  
 1856 [2015; Jordan, 2013](#)). However, the representations of “officials [who] must be careful about  
 1857 issuing warnings because of the danger of panic” and “victims [who] will be dazed and confused,  
 1858 perhaps in shock, and must be cared for by others” ([Scanlon, 2007](#): p. 416) have been shown to  
 1859 be “inaccurate, biased and often exaggerated” ([Rodriguez et al., 2007](#): p. 482). They corroborate  
 1860 certain myths circulating in society, largely deconstructed by the social sciences ([Mileti, 1999](#)).  
 1861 The populations facing extreme situations, rather than becoming confused, passive and irrational,  
 1862 are on the contrary extremely pragmatic and proactive and tend to react by reinforcing social  
 1863 control mechanisms to face danger ([Quarantelli, 2008; Solnit, 2010](#)).

1864 Sharing experiences, emotions and information on a Facebook publication feed is an  
 1865 interesting way to collectively manage stressful situations. But, when scientific knowledge is  
 1866 concerned, the ability to select and comprehend information soon becomes a crucial issue (see  
 1867 the excerpt from STTM Facebook group, 8 Jan 2021, section 6). [Fallou et al. \(2020\)](#) report that  
 1868 the members of the STTM Facebook group worked very rigorously at describing the phenomenon  
 1869 as accurately as possible (following the group, you could know whenever an earthquake was felt,  
 1870 with which intensity and what impact from place to place) and at bringing together all the  
 1871 information they could find (sources were official releases from local authorities, scientific reports  
 1872 from scientific organisations involved in monitoring, and more generally anything that can be  
 1873 found on the Internet, see [Fallou et al., 2020](#)). [Fallou et al. \(2020\)](#) also point to the absence of a  
 1874 professional scientist who could help the group to translate and contextualize this information.  
 1875 The question arises of the role to be played here by the scientific community. It is true that, given  
 1876 the uncertainties, some questions could not be answered but, as suggested by [Lindell et al.](#)  
 1877 (2006), one might have explained earlier what was known and not known, and what could be  
 1878 done to address that lack of knowledge. As noted by [Sharma & Patt \(2012\)](#), recent empirical  
 1879 studies tend to show that “lay people do understand uncertainty and, under conditions of good  
 1880 communication, even understand probabilistic forecasts. Therefore, there may be value in  
 1881 communicating uncertainty from the point of view of improving the credibility of the message.”  
 1882 This is particularly important as many studies have shown that the experience about the credibility  
 1883 of the message affects the response to warning in the next future event ([Lindell et al., 2006;](#)  
 1884 [Sorensen and Sorensen, 2018](#)). The recent development in research about uncertainty  
 1885 communication can help designing communication strategies in this respect (see [Doyle et al.,](#)  
 1886 [2019](#) for an overview). This requires scientists to adapt their practices because, as concluded by  
 1887 [Doyle et al. \(2019\)](#), “scientists must first understand decision-maker needs [and we add here that

a supprimé: will

a mis en forme : Police :Non Italique

a mis en forme : Police :Non Italique, Non Surlignage

a mis en forme : Police :Non Italique, Non Surlignage

a mis en forme : Non Surlignage

<sup>20</sup> [Devès et al. \(under review\)](#) analyse the representation of authorities, scientists and inhabitants in media accounts and show that the place they are ascribed to echoes disaster myths ([Quarantelli, 2008](#)). This is well illustrated in the following press excerpt: “Many irrational reactions, faced with which the BRGM explains...” ([Le Journal de Mayotte, 23 May 2018](#))

1889 at-risk populations are not the least of the decision-makers in case of emergencies], and then  
 1890 concentrate efforts on evaluating and communicating the decision-relevant uncertainties.”

a mis en forme : Non Surlignage

1892 **7.3. The hazard bias and the lack of risk scenarios**

a supprimé: 5

1893  
 1894 We showed that, from the launch of the first scientific campaigns in February/March 2019  
 1895 to the creation and perpetuation of the REVOSIMA (phase B), the format and the nature of  
 1896 communication changed. At first, it was distributed among much more actors and then changed  
 1897 scale with a resumption of communication by national actors (major scientific institutions, CNRS,  
 1898 ministries and government through the DIRMOM). But it remained relatively coherent as each of  
 1899 these actors were referring to the joint Tellus Mayotte work program in their communications. The  
 1900 discoveries made during the MAYOBS1-2 and MAYOBS 3-4 missions constituted an important  
 1901 turning point in the content of the information that was shared. From May 2019, communications  
 1902 no longer focused only on seismic hazard but started drawing a more general explanatory  
 1903 framework attributing earthquakes to an offshore, and unexpected, volcanic activity. But despite  
 1904 this important change, the communication remained centered on hazards rather than on risks,  
 1905 which still does not allow answering the population information needs. Reading the press and the  
 1906 STTM facebook feed, one realizes that people were very excited by the unprecedented scientific  
 1907 mobilisation around their island and expected to learn a lot from scientists. But after the first  
 1908 campaigns, given the extent of the discovery that made fear of potentially high associated risks,  
 1909 the authorities became very cautious about communication. They asked the scientists to refine  
 1910 their scenarios before sharing openly information about risks with the population (we mentioned  
 1911 earlier some tensions in AGU). A scientist reports that “today [a year after the discovery of the  
 1912 volcano] we are starting to talk about all the risks. But we are talking about it with frilosity. But it  
 1913 is not the scientists who talk about it with frilosity, I think that the authorities have locked up this  
 1914 subject a little.” (anonymous, interview in May 2020). Some of the scientists actually share the  
 1915 frilosity of the risk managers pointing out that “I prefer to publish, and to get a peer-to-peer  
 1916 validation of my hypotheses, before sharing them publicly [...] I don’t want to panic people”  
 1917 (anonymous, interview in July 2020). Hence, public information tended to settle for highlighting  
 1918 the unprecedented nature of volcanic activity and the prowess scientists had to deploy to study it.  
 1919 Little was said about the possible evolution of the hazard although, as recalled by another  
 1920 scientist, “we identified [coarsely] the possible scenarios probably from May-June 2019”  
 1921 (anonymous, interview in May 2020). On STTM Facebook Publication feed, the feeling prevailed  
 1922 that communication did not answer the important questions: “[...] The state gives up a lot of money  
 1923 and resources... But no respect for the population! No info (the same for 2 years! True!) No  
 1924 listening to people and their requests! No explanation in the villages [...] And when they give a  
 1925 conference (scientific or press) it is to repeat the same information over and over!” (excerpt from  
 1926 STTM Facebook group, 5 Jan 2021).

a supprimé: 2.

a mis en forme : Normal

a supprimé: F

a supprimé: s

a supprimé: is

a supprimé: s

a supprimé: s

a supprimé: referredreferreds

a supprimé: is

a supprimé: s

a supprimé: are

a supprimé: makes

a supprimé: o

a supprimé: the scientific as well as the official communication

a supprimé: s

a supprimé: must

a supprimé: is

a supprimé: groupThe population feltels abandoned

a supprimé: .

a supprimé: The feeling prevaileds that communication diddoes not answer the important questions, which wereare intimately linked to the issue of risk scenarios

1927 So far, i.e. three years after the beginning of the seismic crisis, scenarios have only been  
 1928 communicated orally, in the form of a listing of potential hazards, indicating that scientists are still  
 1929 working to refine their assessment of the associated risks. But this strategy is debated among  
 1930 scientists. Some argue that “these are still scenarios, so we must be very careful [in  
 1931 communicating] [...] I understand that some scientists are a little confused because a lot of work  
 1932 has been done and not all the information has been passed on to the general public, but I think



1956 *that the general public does not need to know certain information either, because it is all just*  
 1957 *hypotheses and then you take a sentence out of context and it's panic. I understand that"*  
 1958 (anonymous, interview in May 2020). Others respond: *"I think it's better [...] that people are aware*  
 1959 *that one day there could be a mudslide in their garden or a tsunami than not to know. I know that*  
 1960 *Mayotte is maybe more complicated because, I don't know, they have other problems but it's not*  
 1961 *a reason to hide it from [people]..."* (anonymous, interview in June 2020). Between the supporters  
 1962 of a communication based on certainties and quantitative assessment, which is structurally close  
 1963 to the strategy adopted by the authorities, and the supporters of a certain level of academic  
 1964 freedom in communicating hypotheses at work and not just confirmed results, the debate is still  
 1965 open.

1966 Both strategies have advantages and caveats. Davies et al. (2015) argue that *"quantitative*  
 1967 *risk assessment and risk management processes"* are *"of value at regional or larger scales by*  
 1968 *governments and insurance companies"* but do not provide *"a rational basis for reducing the*  
 1969 *impacts at the local (community) level because in any given locality disaster events occur too*  
 1970 *infrequently for their future occurrence in a realistic timeframe to be accurately predicted by*  
 1971 *statistics"*. They suggest, instead, that *"communities, local government officials, civil society*  
 1972 *organisations and scientists could form teams to co-develop local hazard event and effects*  
 1973 *scenarios, around which the teams can then develop realistic long-term plans for building local*  
 1974 *resilience"*. As outlined by earlier studies, as providers of the primary information about the  
 1975 hazards, scientists are - whether they like it or not - at the heart of the risk reduction process (e.g.  
 1976 Rodriguez et al., 2017; Donovan, 2021). They cannot wait for the very last quantitative results to  
 1977 share their knowledge, i.e. their hypothesis, their methods and their results (that can be negative  
 1978 ones proving that an hypothesis does not hold). They have a moral, when, not legal, responsibility  
 1979 to respond to the demand for information from different audiences (authorities, people likely to be  
 1980 affected, journalists, etc.) and at all times (times of larger or smaller uncertainties). Jasanoff  
 1981 (2005) speaks about *"civic epistemology"* as *"the institutionalized practices by which members of*  
 1982 *a given society test knowledge claims used as a basis for making collective choices"*. Scientists'  
 1983 role is indeed all the more central as their opinions not only inform, but also legitimize the  
 1984 decisions taken by the authorities in charge of civil protection. Of course, such a posture is not  
 1985 easy to adopt, notably because there is a bounded understanding of the scientific approach in our  
 1986 societies (e.g., Bromme & Goldman, 2014). During our interviews, we were said that the  
 1987 comments posted on STTM hurted some scientists. Referring to the criticisms read on the  
 1988 Facebook of the STTM group, one of them says: *"What they did not understand is that we did not*  
 1989 *understand what was happening either [...] Because there is no analog [...] We started from an*  
 1990 *area considered as [inactive]. We find ourselves in an unknown zone to manage a phenomenon*  
 1991 *without analogue while having to organize missions involving unprecedented means [i.e. large*  
 1992 *scientific boats that should be booked months in advance] [...] Our role is to make scientific reports*  
 1993 *[but] I think these have a limited impact [because] there is no one on the ground [who can translate*  
 1994 *what we do]."* (anonymous, Interview in July 2020). That such knowledge *"translation"* has to be  
 1995 done by concerned scientists actively engaged in science communication and in answering  
 1996 people's concerns, or by professional *"knowledge brokers"* (Hering, 2016), is an open question.

1997 The publication of an article by REVOSIMA researchers on EarthArxiv (Feuillet et al.,  
 1998 2021) in march 2021 gave, rise to mixed feelings in the STTM feed. The fact that the publication  
 1999 was, not associated with a document in French and addressed to the lay public was, not much

a supprimé: Donovan, Oppenheimer & Bravo, 2012;  
Fearnley and Beaven, 2018;

a supprimé: if

a supprimé:

a supprimé: ives

a supprimé: is

a supprimé: is

2007 appreciated: "they are seriously starting to get on my nerves! A choice to address only peers! And  
 2008 damn for a minimum of popularization and "simple" explanations. Afterwards, they are surprised  
 2009 that some and others tell everything, anything! or blame them for their "Height"" (excerpt from  
 2010 STTM Facebook group, 17 March 2021). The intuitive interpretations they made, of the article,  
 2011 from the point of view of risks, was, rather accurate: "I learn from this cross-section that the  
 2012 volcano's chimney is 15km from Mamoudzou and not 50, where the underwater volcano is  
 2013 formed. Not reassuring. Moreover, the last activities mentioned are in the main volcano, so very  
 2014 close to us." (excerpt from STTM Facebook group, 17 March 2021). People have clearly  
 2015 understood that it is not the new volcanic edifice, that poses a significant risk to them. They are  
 2016 very concerned about the seismicity located closer to the island, especially since the publication  
 2017 of the cross-sectional diagrams of Cesca et al. (2020) and Feuillet et al. (2021). They ask  
 2018 themselves questions about a future eruption very close, and/or collapse on the outer-reef slope  
 2019 generating tsunamis, which corresponds more or less to the scenarios considered by scientists.  
 2020 To this respect, it seems rather vain not to communicate on scenarios.

#### 2021 **7.4. The complexity of multiculturalism**

2022 To conclude this discussion, it is important to come back to an essential fact about risk  
 2023 reduction in Mayotte in its communication aspect. Lindell et al. (2006) emphasize that for  
 2024 individuals to effectively adapt their response to a risky situation, they must not only receive  
 2025 information, but also consider and understand it. It is clear that individuals comprehend  
 2026 information only if it is provided in a language they understand, at a time and in a format they are  
 2027 accustomed to use. The above discussion shows that even if information is shared publicly, it is  
 2028 not properly formatted to be understood even by the educated part of the population. Risk  
 2029 communication in multicultural contexts, and on a small island, poses specific challenges (e.g.  
 2030 Lindell and Perry, 2004 or more recently Bolin, 2018 about race, ethnicity and vulnerability; e.g.  
 2031 Koromowski et al., 2018 on the challenges of risk communication on small islands). The fact that  
 2032 written communication to date has been primarily in French, an official language but one that is  
 2033 far from being well understood by the majority of the population, is a major problem. Efforts have  
 2034 been made to translate some of the communication materials, including the seismic safety  
 2035 guidelines, into Shimaoré in May 2020, but this is far from sufficient. Identifying the various habits  
 2036 of the population with respect to communication (not only language but also practices, who listens  
 2037 to who?) would also be important to adapt both format and contents. As pointed out by the Senator  
 2038 of Mayotte, Thani Mohamed Soilihi, orality plays an important role in Mayotte and written formats  
 2039 would gain to be accompanied orally (radio, animated movies but also neighborhood meetings  
 2040 and informal discussions with prominent members of the various social groups composing  
 2041 Mayotte (associations, cadis, etc.) (interview excerpt in the Report of activity of the DIRMOM,  
 2042 May 2019 - July 2020).

2045

a supprimé: make

a supprimé: are

a supprimé: o

a supprimé: , at least towards the part of the population who is able to understand, with only a little help, how science works and what are the hypotheses and uncertainties...

a supprimé: 5

a supprimé: 2.

a mis en forme : Normal



## 8. Conclusions

2055

2056 As pointed out by Stewart and Lewis (2017), "scientists' attention to technical accuracy  
 2057 and their emphasis on professional consensus may do little to influence multiple publics whose  
 2058 worries instead root into their sense of place, trust and governance, as well as equity and ethics."  
 2059 The work done on the circulation of information from its place of production (the laboratory, the  
 2060 boat, the field) to different publics (authorities, media, population) during the first three years of  
 2061 the Mayotte seismo-volcanic crisis supports this observation (also see Devès et al., under review).  
 2062 As outlined by many earlier studies, there are cultural differences between scientists, authorities,  
 2063 and at-risk populations (e.g. Newhall, 2017; Haynes et al., 2008 for discussion on volcanic cases).  
 2064 We can only agree with Newhall (2017) when he writes that "trying to understand and accept the  
 2065 cultural differences among the various groups, and involving users in the scientific process  
 2066 whenever feasible, are the best ways ... to develop this thrust," which "is essential if that  
 2067 information is to be accepted and used".

2068 The efforts made by the risk chain actors to share information are undeniable, as well as  
 2069 the knowledge built up over time at the cost of a high level of commitment (from the Prime  
 2070 Minister's office to ship technicians). This is reflected in a significant volume of publications that  
 2071 take various forms, from press releases to scientific bulletins, web news or communication events.  
 2072 But the effort is insufficient insofar as it does not allow to reach "the last mile" (e.g., Shah, 2006)  
 2073 towards the populations. Many factors come into play here, some of which are well known to the  
 2074 social sciences, and some of which have to do with the complicated relations between  
 2075 metropolitan France and the overseas territories.

2076 In terms of communication there are several leads to gain efficiency. The first consists in  
 2077 establishing a real strategy of research and expertise dedicated not only to hazard monitoring but  
 2078 more broadly to the reduction of risks, the latter being considered in their technical dimension but  
 2079 also in their human and social aspects. The second lever is to work on the content and formats  
 2080 of information sharing. As emphasized by Oreskes (2015) about seismic risk, "earthquake safety  
 2081 has never been simply a matter of geophysics, but most earthquake scientists, acting qua  
 2082 scientists, have traditionally understood their job to be to study how, when, and why earthquakes  
 2083 happen, and only to a lesser extent (if at all) how to communicate that knowledge to engineers  
 2084 and officials responsible for mitigation, or to the general public [...] But in the contemporary world,  
 2085 the inter-relationship between knowledge and safety is not easily disentangled. Seismology is no  
 2086 longer simply a matter of geophysics, if it ever was. It involves consideration of ethics, values,  
 2087 and monetary and social costs. [The trial of] L'Aquila shows that scientists can no longer ignore  
 2088 the social factors that affect and even control how damaging a particular earthquake may be.  
 2089 Earthquake prediction is a social science." The reasoning applies to the assessment of other  
 2090 "natural" risks. If scientists' main job is not to communicate, they are nevertheless the only ones  
 2091 able to appreciate the robustness of the science-based information. As such, they are expected  
 2092 to take the time to present it in a way that can help risk managers, elected officials, but also  
 2093 journalists and the wider population to act effectively. From this point of view, it seems important  
 2094 to work at clarifying the frontier between the communication of scientific advances on hazard  
 2095 understanding, and the communication of operational risk management measures. That frontier  
 2096 seems particularly blurry in the case of Mayotte. The advantage of this clarification would be  
 2097 twofold. Allowing scientists to explain their hypotheses, results and uncertainties would lead to an

a supprimé: There is a real gap

a supprimé: the culture of the

a supprimé: and

a supprimé: in charge of monitoring and risk  
management,...and that of the local  
and that of the local

a supprimé: and that of the local

a supprimé: T

a supprimé: .

a supprimé: cross

a supprimé: ways

a supprimé: lever

2110 improvement of the population's scientific culture while reinforcing the credibility of the scientific  
2111 expertise. The latter is a pillar of any science-based risk governance process, as one may adhere  
2112 to decisions made by authorities only if he/she believes their scientific basis to be credible. The  
2113 adhesion to the scientific approach is thus a prerequisite to the adhesion to the risk reduction  
2114 approach carried out by the other actors of the chain. The third lever is the association of local  
2115 personalities, elected officials, local NGOs, to the reflection on the risk scenarios and adaptation  
2116 strategies. The international Sendai Framework for Disaster Risk Reduction calls for a more  
2117 integrated practice. The signatory countries reckon that, in order to reduce efficiently the risk of  
2118 disasters, *"there is a need for the public and private sectors and civil society organisations, as  
2119 well as academia and scientific and research institutions, to work more closely together and to  
2120 create opportunities for collaboration [...]"* (Sendai framework page 7 - UNISDR, 2015). Following  
2121 Ismail-Zadeh et al. (2017), Stewart, Ickert and Lacassin (2018) emphasize that the willingness for  
2122 greater integration defines a *"new social contract between hazard scientists and the wider public  
2123 [...]"* that encourages the scientific community to endeavour, alongside their existing technical  
2124 expertise, to *"... support action by local communities and authorities; and support the interface  
2125 between policy and science for decision-making"* (Sendai framework page 22 - UNISDR, 2015)".  
2126 As shown in this paper, this change of expectations creates new challenges for scientists, notably  
2127 on the issue of communication. We hope that this work will contribute to open new avenues for  
2128 transdisciplinary research drawing on geosciences, social sciences and humanities that can  
2129 improve the effectiveness of the science-society nexus for disaster risk reduction.

## 2130 Data availability

2131 EMSC data on the felt seismicity are available from <https://doi.org/10.5281/zenodo.4734032>.  
2132 Instrumental seismicity plotted on Figure 1 is from Lemoine et al. (2020) dataset, and from  
2133 REVOSIMA catalog (not yet available for distribution, these data will be included in Saurel et al.,  
2134 2021). Press releases from the prefecture de Mayotte and French ministries are given in  
2135 supplementary dataset. French version of STTM post excerpts are also given in supplementary  
2136 dataset. Full verbatim of interviews from which we extracted cited excerpts are not public for  
2137 confidentiality. All other data used in this paper are available from cited references.

## 2138 Author contribution

2139 MHD was responsible for the conceptualization of the study, project administration, methodology  
2140 and writing the original draft of the paper. MHD and RL undertook the revision and editing of the  
2141 final paper in concert with all co-authors. MHD and GR were responsible for data curation and  
2142 investigation. RL curated the STTM Facebook threads and selected relevant excerpts. MHD and  
2143 GR conducted and transcribed the interviews. MHD, RL and GR undertook the formal analysis.  
2144 MHD and RL carried out the validation. HP, RL and MHD were responsible for the figures.

## 2145 Acknowledgements

2146 This work benefited from the data of felt seismicity collected by the EMSC  
 2147 (<https://doi.org/10.5281/zenodo.4734032>) whose activities is supported by the *Fondation SCOR*  
 2148 *pour la Science*. The authors would also like to thank Rémy Bossu, Laure Fallou and Matthieu  
 2149 Landès from EMSC who provided very useful comments at different stages of the work. People  
 2150 interviewed during these three years are also to be thanked for their invaluable contribution to our  
 2151 thinking process. The authors also want to thank [Emmelyne Mitard, communication officer in](#)  
 2152 [JPGP](#), scientists and officials from the DIRMOM, the prefecture of Mayotte and the REVOSIMA  
 2153 for their help in setting up exhaustive records on the communication elements put in place by the  
 2154 scientists and the authorities during the course of the crisis. Many thanks also to Aline Peltier who  
 2155 chairs the scientific committee of REVOSIMA and kindly agreed to read and comment on the  
 2156 paper before its submission. And finally, thanks to Louise Le Vagueresse and Hugo Pierrot,  
 2157 whose work helped us to check the completeness of our communication database.

2158  
 2159 This research has been supported by the IdEx Université de Paris, Centre des Politiques de la  
 2160 Terre, ANR-18-IDEX-0001.

## 2161 Competing interests

2162 The authors declare that they have no conflict of interest.

## 2163 References

- 2164 Ali, R. Question écrite à M. le ministre d'État, ministre de l'intérieur sur la crise sismique à Mayotte,  
 2165 Pub. L. No. 8992, 23AN Journal Officiel Assemblée Nationale 4665 (2018). Retrieved from  
 2166 <https://www2.assemblee-nationale.fr/questions/detail/15/QE/8992>
- 2167 Andrews, R. G. (2019, May 24). Scientists Witness the Birth of a Submarine Volcano for the First  
 2168 Time. *Gizmodo*. Retrieved from:  
 2169 <https://gizmodo.com/scientists-witness-the-birth-of-a-submarine-volcano-for-1834990629>
- 2170 [Bachèlery, P., Morin, J., Villeneuve, N., Soulé, H., Nassor, H., & Ali, A. R. \(2016\). Structure and](#)  
 2171 [eruptive history of Karthala volcano. In Active Volcanoes of the Southwest Indian Ocean](#)  
 2172 [\(pp. 345-366\). Springer, Berlin, Heidelberg. DOI: 10.1007/978-3-642-31395-0\\_22](#)
- 2173 BBC - Science in Action. (2019, May 27). The birth of a new volcano. *BBC*. Retrieved from  
 2174 <https://www.bbc.co.uk/programmes/w3csym1q>

- 2175 Bertil, D., Roullé, A., Lemoine, A., Colombain, A., Maisonhaute, E., & Dectot, G. (2018).  
 2176 MAYEQSwarm2018 : BRGM earthquake catalogue for the Earthquake Swarm located  
 2177 East of Mayotte. May 10th -November 12th 2018. *DataBRGM*.  
 2178 <https://doi.org/10.18144/372c5809-3d30-440c-b44a-1c89385f176a>
- 2179 [Bertil, D., Mercury, N., Doubre, C., Lemoine, A., & Van der Woerd, J. \(2021\). The unexpected](#)  
 2180 [Mayotte 2018–2020 seismic sequence: a reappraisal of the regional seismicity of the](#)  
 2181 [Comoros. \*Comptes Rendus Géoscience\*, 353\(S1\), 1-25.](#)  
 2182 <https://doi.org/10.5802/crgeos.79>
- 2183 [Becker J.S. et al. \(2017\). Organisational response to the 2007 Ruapehu Crater Lake dam-break](#)  
 2184 [lahar in New Zealand: use of communication in creating an effective response. In:](#)  
 2185 [Fearnley C.J., Bird D.K., Haynes K., McGuire W.J., Jolly G. \(eds\) \*Observing the Volcano\*](#)  
 2186 [World. \*Advances in Volcanology \(An Official Book Series of the International Association\*](#)  
 2187 [of Volcanology and Chemistry of the Earth's Interior – IAVCEI, Barcelona, Spain\).](#)  
 2188 [Springer, Cham. \[https://doi.org/10.1007/11157\\\_2016\\\_38\]\(https://doi.org/10.1007/11157\_2016\_38\)](#)
- 2189 [Bolin, B. \(2018\). Race, Class, Ethnicity and Disaster Vulnerability In \*Handbook of disaster\*](#)  
 2190 [research \(pp. 476-488\). Springer, New York, NY. \[32353-4\\\_7\]\(https://doi.org/10.1007/978-0-387-</a></a><br/>
  2191 <a href=\)](#)
- 2192 Borraz, O. (2019, October 3). Lubrizol : pourquoi la « gestion de crise » à la française est  
 2193 dépassée. *The Conversation*. Retrieved from:  
 2194 <http://theconversation.com/lubrizol-pourquoi-la-gestion-de-crise-a-la-francaise-est->  
 2195 [depassee-124648](http://theconversation.com/lubrizol-pourquoi-la-gestion-de-crise-a-la-francaise-est-depassee-124648)
- 2196 Bossu, R., Steed, R., Roussel, F., Landès, M., Fuenzalida, A., Matrullo, E., et al. (2019). App  
 2197 Earthquake Detection and Automatic Mapping of Felt Area. *Seismological Research*  
 2198 *Letters*, 90(1), 305–312. <https://doi.org/10.1785/0220180185>
- 2199 BRGM. (2018a). *Crise sismique en cours dans la région de Mayotte depuis le 10 Mai 2018*.  
 2200 Retrieved from:

- 2201 <https://www.brgm.fr/sites/default/files/documents/2020-09/dossier-thematique-mayotte->  
2202 [points-situation-brgm-2018.pdf](https://www.brgm.fr/sites/default/files/documents/2020-09/dossier-thematique-mayotte-points-situation-brgm-2018.pdf)
- 2203 BRGM. (2018b, December 17). Essaim de séismes à Mayotte : la connaissance du phénomène  
2204 se précise. Retrieved April 27, 2021, from:  
2205 [https://www.brgm.fr/fr/actualite/actualite/essaim-seismes-mayotte-connaissance-](https://www.brgm.fr/fr/actualite/actualite/essaim-seismes-mayotte-connaissance-phenomene-precise)  
2206 [phenomene-precise](https://www.brgm.fr/fr/actualite/actualite/essaim-seismes-mayotte-connaissance-phenomene-precise)
- 2207 Briole, P. (2018). Mayotte seismo-volcanic crisis. Retrieved January 8, 2021, from  
2208 <http://www.geosciences.ens.fr/volcanologie/actualites/mayotte/>
- 2209 Bromme, R., & Goldman, S. R. (2014). The Public's Bounded Understanding of Science.  
2210 *Educational Psychologist*, 49(2), 59–69. <https://doi.org/10.1080/00461520.2014.921572>
- 2211 Brown, M. B. (2009). *Science in democracy: Expertise, institutions, and representation*. MIT  
2212 Press, Cambridge, MA and London, 2009, 354pp., ISBN: 978-0262513043
- 2213 Cesca, S., Letort, J., Razafindrakoto, H. N. T., Heimann, S., Rivalta, E., Isken, M. P., et al. (2020).  
2214 Drainage of a deep magma reservoir near Mayotte inferred from seismicity and  
2215 deformation. *Nature Geoscience*, 13(1), 87–93.  
2216 <https://doi.org/10.1038/s41561-019-0505-5>
- 2217 [Class, C., Goldstein, S. L., & Shirey, S. B. \(2009\). Osmium isotopes in Grande Comore lavas: a](https://doi.org/10.1038/s41561-019-0505-5)  
2218 [new extreme among a spectrum of EM-type mantle endmembers. \*Earth and Planetary\*](https://doi.org/10.1038/s41561-019-0505-5)  
2219 [\*Science Letters\*, 284\(1-2\), 219-227. <https://doi.org/10.1016/j.epsl.2009.04.031>](https://doi.org/10.1038/s41561-019-0505-5)
- 2220 CNRS. (2019, February 22). Le CNRS lance une campagne d'observation de l'activité sismique  
2221 à Mayotte | CNRS. Retrieved June 1, 2021, from:  
2222 [https://www.cnrs.fr/fr/le-cnrs-lance-une-campagne-dobservation-de-lactivite-sismique-](https://www.cnrs.fr/fr/le-cnrs-lance-une-campagne-dobservation-de-lactivite-sismique-mayotte)  
2223 [mayotte](https://www.cnrs.fr/fr/le-cnrs-lance-une-campagne-dobservation-de-lactivite-sismique-mayotte)
- 2224 CNRS, & Université de Toulouse III. (2020, January 7). Volcan au large de Mayotte : la sismicité  
2225 éclaire les étapes de sa formation | CNRS. Retrieved April 28, 2021, from:  
2226 <https://www.cnrs.fr/fr/volcan-au-large-de-mayotte-la-sismicite-eclaire-les-etapes-de-sa->

- 2227 formation
- 2228 Cocco, M., Cultrera, G., Amato, A., Braun, T., Cerase, A., Margheriti, L., et al. (2015). The L'Aquila  
2229 trial. *Geological Society, London, Special Publications*, 419(1), 43–55.  
2230 <https://doi.org/10.1144/SP419.13>
- 2231 [Courant, F., Biscay, J.F., Boutillet, D., Rizza, C., Vinet, F., Weiss, K. \(2021\). Rapport de la mission  
2232 sur la transparence, l'information et la participation de tous à la gestion des risques  
2233 majeurs, technologiques ou naturels. June 2021. Ministère de la Transition écologique et  
2234 solidaire, France.](#)
- 2235 Davies, T., Beaven, S., Conradson, D., Densmore, A., Gaillard, J., Johnston, D., et al. (2015).  
2236 Towards disaster resilience: A scenario-based approach to co-producing and integrating  
2237 hazard and risk knowledge. *International Journal of Disaster Risk Reduction*, 13, 242–  
2238 247. <https://doi.org/10.1016/j.ijdr.2015.05.009>
- 2239 Deplus, C., Feuillet, N., Bachelery, P., Fouquet, Y., Jorry, S., Thion, I., et al. (2019). Early  
2240 Development and Growth of a Deep Seafloor Volcano : Preliminary Results from the  
2241 MAYOBS Cruises. In *AGU Fall meeting*. Retrieved from:  
2242 <https://agu.confex.com/agu/fm19/meetingapp.cgi/Paper/560238>
- 2243 [Devès, M.H., Moirand, S., Le Vaqueresse, L., & Robert, G., \(2021\). Mayotte's Seismo-Volcanic  
2244 "Crisis" in News Accounts \(2018-2021\). Comptes rendus de l'Académie des Sciences,  
2245 Géoscience, In review.](#)
- 2246 [Dofal, A., Fontaine, F. R., Michon, L., Barruol, G., & Tkalčić, H. \(2021\). Nature of the crust  
2247 beneath the islands of the Mozambique Channel: Constraints from receiver functions.  
2248 \*Journal of African Earth Sciences\*, 184. <https://doi.org/10.1016/j.jafrearsci.2021.104379>](#)
- 2249 Donovan, A., [Bravo, M.](#) & Oppenheimer, C., (2012). Social studies of volcanology: knowledge  
2250 generation and expert advice on active volcanoes. *Bulletin of Volcanology*, 74(3), 677-  
2251 689. [doi:10.1093/scipol/scs078](https://doi.org/10.1093/scipol/scs078)
- 2252 [Donovan, A., & Oppenheimer, C. \(2012\). Governing the lithosphere: insights from Eyjafjallajökull](#)

a supprimé: & Bravo, M.



- 2254 [concerning the role of scientists in supporting decision-making on active volcanoes.](#)  
2255 [Journal of Geophysical Research: Solid Earth, 117\(B3\).](#)  
2256 <https://doi.org/10.1029/2011JB009080>
- 2257 Donovan, A. (2019). Critical volcanology? Thinking holistically about risk and uncertainty. *Bulletin*  
2258 *of Volcanology*, 81(4), 1-20. <https://doi.org/10.1007/s00445-019-1279-8>
- 2259 [Donovan, A. \(2021\). Experts in emergencies: A framework for understanding scientific advice in](#)  
2260 [crisis contexts. International Journal of Disaster Risk Reduction, 56,](#)  
2261 <https://doi.org/10.1016/j.ijdrr.2021.102064>
- 2262 [Doyle, E. E., & Paton, D. \(2018\). Decision-making: preventing miscommunication and creating](#)  
2263 [shared meaning between stakeholders. In: Fearnley C.J., Bird D.K., Haynes K., McGuire](#)  
2264 [W.J., Jolly G. \(eds\) Observing the Volcano World. Advances in Volcanology \(An Official](#)  
2265 [Book Series of the International Association of Volcanology and Chemistry of the Earth's](#)  
2266 [Interior – IAVCEI, Barcelona, Spain\). Springer.](#)  
2267 <https://doi.org/10.1007/978-3-319-44097-2>
- 2268 [Drabek, T. E. \(1986\). Human system responses to disaster: An inventory of sociological findings.](#)  
2269 [New York: Springer-Verlag.](#)
- 2270 Edwards, R., & Holland, J. (2013). *What is Qualitative Interviewing?* A&C Black.
- 2271 [Eiser, J. R., Stafford, T., Henneberry, J., & Catney, P. \(2009\). "Trust me, I'm a scientist \(not a](#)  
2272 [developer\)": Perceived expertise and motives as predictors of trust in assessment of risk](#)  
2273 [from contaminated land. Risk Analysis: An International Journal, 29\(2\), 288-297.](#)  
2274 <https://doi.org/10.1111/j.1539-6924.2008.01131.x>
- 2275 [Emerick, C. M., & Duncan, R. A. \(1982\). Age progressive volcanism in the Comores Archipelago,](#)  
2276 [western Indian Ocean and implications for Somali plate tectonics. Earth and Planetary](#)  
2277 [Science Letters, 60\(3\), 415-428.](#)  
2278 [https://doi.org/10.1016/0012-821X\(82\)90077-2](https://doi.org/10.1016/0012-821X(82)90077-2)
- 2279 EMSC-CSEM. (2021). *EMSC-CSEM/Earthquake\_Sequence\_Mayotte\_2018\_2021: Second*

- 2280 *release*. Zenodo. <https://doi.org/10.5281/zenodo.4734032>
- 2281 EOST. (2018a, June 11). Mission du Groupe d'Intervention Macrosismique à Mayotte. Retrieved  
2282 April 26, 2021, from:  
2283 [https://eost.unistra.fr/actualites/actualite/mission-du-groupe-dintervention-](https://eost.unistra.fr/actualites/actualite/mission-du-groupe-dintervention-macrosismique-a-mayotte)  
2284 [macrosismique-a-mayotte](https://eost.unistra.fr/actualites/actualite/mission-du-groupe-dintervention-macrosismique-a-mayotte)
- 2285 EOST. (2018b, June 18). Eclaircissements sur la séquence sismique de Mayotte ? Mai-juin 2018.  
2286 Retrieved April 26, 2021, from:  
2287 [https://eost.unistra.fr/actualites/actualite/eclaircissements-sur-la-sequence-sismique-de-](https://eost.unistra.fr/actualites/actualite/eclaircissements-sur-la-sequence-sismique-de-mayotte-mai-juin-2018/)  
2288 [mayotte-mai-juin-2018/](https://eost.unistra.fr/actualites/actualite/eclaircissements-sur-la-sequence-sismique-de-mayotte-mai-juin-2018/)
- 2289 Fallou, L., & Bossu, R. (2019, March 8). Taking into account the cultural context to improve  
2290 scientific communication – Lessons learned from earthquakes in Mayotte. Retrieved  
2291 October 15, 2020, from:  
2292 [https://blogs.egu.eu/divisions/sm/2019/03/08/taking-into-account-the-cultural-context-to-](https://blogs.egu.eu/divisions/sm/2019/03/08/taking-into-account-the-cultural-context-to-improve-scientific-communication-lessons-learned-from-earthquakes-in-mayotte/)  
2293 [improve-scientific-communication-lessons-learned-from-earthquakes-in-mayotte/](https://blogs.egu.eu/divisions/sm/2019/03/08/taking-into-account-the-cultural-context-to-improve-scientific-communication-lessons-learned-from-earthquakes-in-mayotte/)
- 2294 Fallou, L., Bossu, R., Landès, M., Roch, J., Roussel, F., Steed, R., & Julien-Laferrrière, S. (2020).  
2295 Citizen Seismology Without Seismologists? Lessons Learned From Mayotte Leading to  
2296 Improved Collaboration. *Frontiers in Communication*, 5.  
2297 <https://doi.org/10.3389/fcomm.2020.00049>
- 2298 Famin, V., Michon, L., & Bourhane, A. (2020). The Comoros archipelago: a right-lateral transform  
2299 boundary between the Somalia and Lwandle plates. *Tectonophysics*, 789, 228539.  
2300 <https://doi.org/10.1016/j.tecto.2020.228539>
- 2301 Fearnley, C. J. (2013). Assigning a volcano alert level: negotiating uncertainty, risk, and  
2302 complexity in decision-making processes. *Environment and Planning a*, 45(8), 1891-1911.
- 2303 Fearnley, C. J., & Beaven, S. (2018). Volcano alert level systems: managing the challenges of  
2304 effective volcanic crisis communication. *Bulletin of volcanology*, 80(5), 1-18.
- 2305 Feuillet, N., Jorry, S., Crawford, W. C., Deplus, C., Thion, I., Jacques, E., et al. (2019). Birth of

- 2306 a large volcano offshore Mayotte through lithosphere-scale rifting. In *AGU Fall meeting*.  
 2307 Retrieved from <https://agu.confex.com/agu/fm19/meetingapp.cgi/Paper/489830>
- 2308 Feuillet, N., Jorry, S., Crawford, W., Deplus, C., Thinon, I., Jacques, E., et al. (2021). Birth of a  
 2309 large volcanic edifice through lithosphere-scale dyking offshore Mayotte (Indian Ocean).  
 2310 *EarthArXiv*. <https://doi.org/10.31223/X5B89P>
- 2311 Feuillet, N. (2019). MAYOBS. *French Oceanic Cruises*. <https://doi.org/10.18142/291>
- 2312 [Gilbert, C. \(2005\). Studying disaster: changes in the main conceptual tools. In E.L. Quarantelli](#)  
 2313 [\(Ed.\), What is a Disaster?: perspectives on the question \(pp. 11-18\). London: Routledge.](#)
- 2314 [Haynes, K., Barclay, J., & Pidgeon, N. \(2008\). The issue of trust and its influence on risk](#)  
 2315 [communication during a volcanic crisis. \*Bulletin of Volcanology\*, 70, 605-621.](#)  
 2316 <https://doi.org/10.1007/s00445-007-0156-z>
- 2317 Hering, J. G. (2016). Do we need “more research” or better implementation through knowledge  
 2318 brokering? *Sustainability Science*, 11(2), 363–369.  
 2319 <https://doi.org/10.1007/s11625-015-0314-8>
- 2320 INSEE. (2017, March 13). Mayotte : les langues en 2007 - Insee. Retrieved March 22, 2021, from  
 2321 <https://www.insee.fr/fr/statistiques/2569783>
- 2322 INSEE. (2021, January 11). L'essentiel sur... Mayotte - Insee. Retrieved March 22, 2021, from:  
 2323 <https://www.insee.fr/fr/statistiques/4632225>
- 2324 IPGP. (2018, June 12). Essaim sismique à l'est de Mayotte, mai-juin 2018. Retrieved April 26,  
 2325 2021, from <https://www.ipgp.fr/fr/essaim-simique-a-lest-de-mayotte-mai-juin-2018>
- 2326 IPGP. (2019a, May 16). Découverte de la naissance d'un nouveau volcan sous-marin à l'Est de  
 2327 Mayotte. Retrieved April 27, 2021, from:  
 2328 [https://www.ipgp.fr/fr/decouverte-de-naissance-dun-nouveau-volcan-marin-a-lest-de-](https://www.ipgp.fr/fr/decouverte-de-naissance-dun-nouveau-volcan-marin-a-lest-de-mayotte)  
 2329 [mayotte](https://www.ipgp.fr/fr/decouverte-de-naissance-dun-nouveau-volcan-marin-a-lest-de-mayotte)
- 2330 IPGP. (2019b, August 27). Réseau de surveillance Volcanologique et Sismologique de Mayotte  
 2331 REVOSIMA. Retrieved April 27, 2021, from:

- 2332 [https://www.ipgp.fr/fr/revosima/reseau-de-surveillance-volcanologique-sismologique-de-](https://www.ipgp.fr/fr/revosima/reseau-de-surveillance-volcanologique-sismologique-de-mayotte)  
 2333 [mayotte](https://www.ipgp.fr/fr/revosima/reseau-de-surveillance-volcanologique-sismologique-de-mayotte)
- 2334 IPGP. (2020, October 29). Premier bilan de la campagne Mayobs15 de suivi de l'activité du volcan  
 2335 de Mayotte | INSTITUT DE PHYSIQUE DU GLOBE DE PARIS. Retrieved May 28, 2021,  
 2336 from:  
 2337 [http://www.ipgp.fr/fr/premier-bilan-de-campagne-mayobs15-de-suivi-de-lactivite-volcan-](http://www.ipgp.fr/fr/premier-bilan-de-campagne-mayobs15-de-suivi-de-lactivite-volcan-de-mayotte)  
 2338 [de-mayotte](http://www.ipgp.fr/fr/premier-bilan-de-campagne-mayobs15-de-suivi-de-lactivite-volcan-de-mayotte)
- 2339 Ismail-Zadeh, A. T., Cutter, S. L., Takeuchi, K., & Paton, D. (2017). Forging a paradigm shift in  
 2340 disaster science. *Natural Hazards*, 86(2), 969–988.  
 2341 <https://doi.org/10.1007/s11069-016-2726-x>
- 2342 Jacques, E., Feuillet, N., Aiken, C., Lemoine, A., Crawford, W. C., Deplus, C., et al. (2019). The  
 2343 2018-2019 Mayotte Seismic Crisis: Evidence of an upper Mantle Rifting Event? In *AGU*  
 2344 *Fall meeting*. Retrieved from:  
 2345 <https://agu.confex.com/agu/fm19/meetingapp.cgi/Paper/557580>
- 2346 Jasanoff, S. (2004). *States of Knowledge: the Co-production of Science and Social Order*,  
 2347 Routledge, Abingdon.
- 2348 Jasanoff, S. (2005). *Designs on Nature: Science and Democracy in Europe and the United States*,  
 2349 Princeton University Press, Princeton
- 2350 Jordan, T. H. (2013). Lessons of L'Aquila for Operational Earthquake Forecasting. *Seismological*  
 2351 *Research Letters*, 84(1), 4–7. <https://doi.org/10.1785/0220120167>
- 2352 [Komorowski J.C., Morin J., Jenkins S., Kelman I. \(2016\) Challenges of Volcanic Crises on Small](#)  
 2353 [Islands States. In: Fearnley C.J., Bird D.K., Haynes K., McGuire W.J., Jolly G. \(eds\)](#)  
 2354 [Observing the Volcano World. Advances in Volcanology \(An Official Book Series of the](#)  
 2355 [International Association of Volcanology and Chemistry of the Earth's Interior – IAVCEI,](#)  
 2356 [Barcelona, Spain\). Springer, Cham. https://doi.org/10.1007/11157\\_2015\\_15](#)
- 2357 Lacassin, R. (2019, May 16). Another amazing view, in section, of the newly discovered active

2358 volcano 50km offshore Mayotte, Twitter. Retrieved May 4, 2021, from:  
 2359 <https://twitter.com/RLacassin/status/1129065778752512002>

2360 Lacassin, R., Devès, M., Hicks, S. P., Ampuero, J.-P., Bossu, R., Bruhat, L., et al. (2020). Rapid  
 2361 collaborative knowledge building via Twitter after significant geohazard events.  
 2362 *Geoscience Communication*, 3(1), 129–146. <https://doi.org/10.5194/gc-3-129-2020>

2363 [Lagadec, P. \(1993\). \*Preventing chaos in a crisis\*. Maidenhead: McGraw-Hill.](#)

2364 [Lambek, M. \(2018\) \*Island in the Stream: an ethnographic history of Mayotte\*. Anthropological  
 2365 Horizons, University of Toronto Press, Canada.](#)

2366 [Lavayssière, A., Crawford, W., Saurel, J. M., Satriano, C., Feuillet, N., Jacques, E., &  
 2367 Komorowski, J. C. \(2021\). A new 1D velocity model and absolute locations image the  
 2368 Mayotte seismo-volcanic region. \*Journal of Volcanology and Geothermal Research\*,  
 2369 107440. <https://doi.org/10.1016/j.jvolgeores.2021.107440>](#)

2370 Le Figaro. (2018a, May 14). Mayotte: une centaine de micro-séismes depuis jeudi. *Le Figaro*.  
 2371 Retrieved from:  
 2372 [https://www.lefigaro.fr/flash-actu/2018/05/14/97001-20180514FILWWW00287-mayotte-  
 2374 une-centaine-de-micro-seismes-depuis-jeudi.php](https://www.lefigaro.fr/flash-actu/2018/05/14/97001-20180514FILWWW00287-mayotte-<br/>
  2373 une-centaine-de-micro-seismes-depuis-jeudi.php)

2374 Le Figaro. (2018b, June 15). Mayotte : avec plus de 1400 séismes en un mois, la population vit  
 2375 dans la peur. *Le Figaro*. Retrieved from:  
 2376 [https://www.lefigaro.fr/actualite-france/2018/06/15/01016-20180615ARTFIG00172-  
 2378 mayotte-avec-plus-de-1400-seismes-en-un-mois-la-population-vit-dans-la-peur.php](https://www.lefigaro.fr/actualite-france/2018/06/15/01016-20180615ARTFIG00172-<br/>
  2377 mayotte-avec-plus-de-1400-seismes-en-un-mois-la-population-vit-dans-la-peur.php)

2378 [Le Figaro. \(2018, May 21\). À Mayotte, les séismes en série inquiètent la population. Retrieved  
 2379 from: \[https://www.lefigaro.fr/actualite-france/2018/05/21/01016-20180521ARTFIG00139-  
 2381 -mayotte-les-seismes-en-serie-inquietent-la-population.php\]\(https://www.lefigaro.fr/actualite-france/2018/05/21/01016-20180521ARTFIG00139-<br/>
  2380 -mayotte-les-seismes-en-serie-inquietent-la-population.php\)](#)

2381 [Le Journal de Mayotte. \(2018, 19 May\). "L'activité sismique reste anormale et perdue" selon la  
 2382 préfecture. Retrieved from:  
 2383 <https://lejournaldemayotte.vt/2018/05/19/lactivite-sismique-reste-anormale-et-perdure->](#)

a mis en forme : Français

- 2384 [selon-la-prefecture/](#)
- 2385 [Le Journal de Mayotte. \(2018, 23 May\). Divergence de localisation des séismes entre opérateurs](#)
- 2386 [: le BRGM s'explique. Retrieved from:](#)
- 2387 <https://lejournaldemayotte.yt/2018/05/23/divergence-de-localisation-des-seismes-entre->
- 2388 [opérateurs-le-brgm-sexplique/](#)
- 2389 [Le Journal de Mayotte. \(2018, 28 May\). Le volcan, nouvelle vitrine de Mayotte. Retrieved from:](#)
- 2390 <https://lejournaldemayotte.yt/2019/05/28/le-volcan-nouvelle-vitrine-de-mayotte/>
- 2391 [Le Journal de Mayotte. \(2019, 27 August\). Branle-bas de combat autour du risque volcan avec la](#)
- 2392 [mise en place de 80 mesures. Retrieved from:](#)
- 2393 <https://lejournaldemayotte.yt/2019/08/27/branle-bas-de-combat-autour-du-risque-volcan->
- 2394 [avec-la-mise-en-place-de-80-mesures/](#)
- 2395 Le Point. (2018, May 16). Séismes à Mayotte: la préfecture active une cellule de crise (AFP). *Le*
- 2396 *Point*. Retrieved from:
- 2397 <https://www.lepoint.fr/societe/seismes-a-mayotte-la-prefecture-active-une-cellule-de->
- 2398 [crise-16-05-2018-2218835\\_23.php](#)
- 2399 Lemoine, A., Briole, P., Bertil, D., Roullé, A., Foumelis, M., Thinon, I., et al. (2019). The 2018-
- 2400 2019 seismo-volcanic crisis east of Mayotte, Comoros islands: seismicity and ground
- 2401 deformation markers of an exceptional submarine eruption. *EarthArXiv*.
- 2402 <https://doi.org/10.31223/OSF.IO/D46XJ>
- 2403 Lemoine, A., Briole, P., Bertil, D., Roullé, A., Foumelis, M., Thinon, I., et al. (2020). The 2018–
- 2404 2019 seismo-volcanic crisis east of Mayotte, Comoros islands: seismicity and ground
- 2405 deformation markers of an exceptional submarine eruption. *Geophysical Journal*
- 2406 *International*, 223(1), 22–44. <https://doi.org/10.1093/gji/ggaa273>
- 2407 Lindell, M. K., Prater, C., [Perry, R. W.](#), & Nicholson, W. C. (2006). *Fundamentals of emergency*
- 2408 *management*. FEMA Washington, DC, USA
- 2409 [Lindell, M. K., & Perry, R. W. \(2004\). Communicating environmental risk in multiethnic](#)



- 2410 [communities. Sage Publications](#)
- 2411 Mayotte la 1ère. (2018, May 31). La mission gouvernementale sur les séismes est attendue à  
 2412 Mayotte, ce vendredi. Retrieved April 27, 2021, from:  
 2413 [https://la1ere.francetvinfo.fr/mayotte/mission-gouvernementale-seismes-est-attendue-  
 ce-vendredi-594683.html](https://la1ere.francetvinfo.fr/mayotte/mission-gouvernementale-seismes-est-attendue-<br/>
  2414 ce-vendredi-594683.html)
- 2415 Michon, L. (2016). The Volcanism of the Comoros Archipelago Integrated at a Regional Scale. In  
 2416 P. Bachelery, J.-F. Lenat, A. Di Muro, & L. Michon (Eds.), *Active Volcanoes of the*  
 2417 *Southwest Indian Ocean: Piton de la Fournaise and Karthala* (pp. 333–344). Berlin,  
 2418 Heidelberg: Springer. [https://doi.org/10.1007/978-3-642-31395-0\\_21](https://doi.org/10.1007/978-3-642-31395-0_21)
- 2419 Mileti, D. S. (1993). Communicating Public Earthquake Risk Information. In J. Nemeč, J. M. Nigg,  
 2420 & F. Siccardi (Eds.), *Prediction and Perception of Natural Hazards* (Vol. 2, pp. 143–152).  
 2421 Dordrecht: Springer Netherlands.  
 2422 [https://doi.org/10.1007/978-94-015-8190-5\\_17](https://doi.org/10.1007/978-94-015-8190-5_17)
- 2423 [Mileti, D. \(1999\). \*Disasters by design: A reassessment of natural hazards in the United States.\*  
 2424 \*Joseph Henry Press.\*](#)
- 2425 [Mileti, D. S., & Sorensen, J. H. \(1990\). \*Communication of emergency public warnings: A social  
 2426 science perspective and state-of-the-art assessment, ORNL-6609. Oak Ridge National  
 2427 Lab., TN: Oak Ridge National Laboratory, Department of Energy, USA.\*](#)
- 2428 Minassian, V. T. (2019, July 8). Naissance du quatrième volcan actif français à Mayotte. *Le*  
 2429 *Monde.fr*. Retrieved from:  
 2430 [https://www.lemonde.fr/sciences/article/2019/07/08/naissance-du-quatrieme-volcan-  
 actif-francais-a-mayotte\\_5486738\\_1650684.html](https://www.lemonde.fr/sciences/article/2019/07/08/naissance-du-quatrieme-volcan-<br/>
  2431 actif-francais-a-mayotte_5486738_1650684.html)
- 2432 Minassian, V. T. (2021, March 15). À Mayotte, naissance d'un volcan sous-marin | Le blob, l'extra-  
 2433 média. Retrieved April 28, 2021, from:  
 2434 <https://leblob.fr/enquetes/mayotte-naissance-un-volcan-sous-marin>
- 2435 Ministère de la Transition écologique et solidaire, ministère de l'Enseignement supérieur de la

2436 recherche et de l'Innovation, ministère des Outre-Mer, ministère de l'Intérieur. (2019, May  
2437 16). Découverte de la naissance d'un nouveau volcan sous-marin à l'Est de Mayotte :  
2438 améliorer nos connaissances et prévenir les risques. Retrieved March 23, 2021, from:  
2439 [https://www.ecologie.gouv.fr/decouverte-naissance-dun-nouveau-volcan-sous-marin-](https://www.ecologie.gouv.fr/decouverte-naissance-dun-nouveau-volcan-sous-marin-lest-mayotte-ameliorer-nos-connaissances-et)  
2440 [lest-mayotte-ameliorer-nos-connaissances-et](https://www.ecologie.gouv.fr/decouverte-naissance-dun-nouveau-volcan-sous-marin-lest-mayotte-ameliorer-nos-connaissances-et)

2441 Ministère des Outre-Mer. (2016, November 25). Mayotte - Culture. Retrieved March 22, 2021,  
2442 from <https://outre-mer.gouv.fr/mayotte-culture>

2443 [Mori, M. \(2021\). Crisis narratives and \(dis\)placement: Space, time and earthquakes in Mayotte.](#)  
2444 [Ampersand, 8, 100078. <https://doi.org/10.1016/j.amper.2021.100078>](#)

2445 [Morin, J., Bachèlery, P., Soulé, H., Nassor, H. \(2016\). Volcanic risk and crisis management on](#)  
2446 [Grande Comore Island. In Active Volcanoes of the Southwest Indian Ocean \(pp. 403-422\).](#)  
2447 [Springer, Berlin, Heidelberg. \[https://doi.org/10.1007/978-3-642-31395-0\\\_25\]\(https://doi.org/10.1007/978-3-642-31395-0\_25\)](#)

2448 Newhall, C. (1999). Professional conduct of scientists during volcanic crises. *Bulletin of*  
2449 *Volcanology*, 60(5), 323-334.

2450 [Newhall C. \(2017\) Cultural Differences and the Importance of Trust Between Volcanologists and](#)  
2451 [Partners in Volcanic Risk Mitigation. In: Fearnley C.J., Bird D.K., Haynes K., McGuire](#)  
2452 [W.J., Jolly G. \(eds\) Observing the Volcano World. Advances in Volcanology \(An Official](#)  
2453 [Book Series of the International Association of Volcanology and Chemistry of the Earth's](#)  
2454 [Interior – IAVCEI, Barcelona, Spain\). Springer, Cham.](#)  
2455 [https://doi.org/10.1007/11157\\_2016\\_40](https://doi.org/10.1007/11157_2016_40)

2456 Oreskes, N. (2004). Science and public policy: what's proof got to do with it? *Environmental*  
2457 *science & policy*, 7(5), 369-383.

2458 Oreskes, N. (2015). How Earth Science Has Become a Social Science (Version 1). *Historical*  
2459 *Social Research*, 40, 246–270. <https://doi.org/10.12759/HSR.40.2015.2.246-270>

2460 Paquet, F. (2020, August 25). Deux ans de crise sismique et la naissance d'un volcan sous-marin  
2461 à Mayotte. *The Conversation*. Retrieved from:

- 2462 <http://theconversation.com/deux-ans-de-crise-sismique-et-la-naissance-dun-volcan->  
 2463 [sous-marin-a-mayotte-144461](http://theconversation.com/deux-ans-de-crise-sismique-et-la-naissance-dun-volcan-sous-marin-a-mayotte-144461)
- 2464 Pease, R. (2019). Ship spies largest underwater eruption ever. *Science | AAAS*.  
 2465 <https://doi.org/10.1126/science.aay1175>
- 2466 [Pelleter, A. A., Caroff, M., Cordier, C., Bachèlery, P., Nehlig, P., Debeuf, D., & Arnaud, N. \(2014\).](#)  
 2467 [Meliite-bearing lavas in Mayotte \(France\): An insight into the mantle source below the](#)  
 2468 [Comores. \*Lithos\*, 208, 281-297. https://doi.org/10.1016/j.lithos.2014.09.012](#)
- 2469 Perzo, A. (2018a, May 23). Séisme: le maire de Mamoudzou appelle la population au calme - Le  
 2470 Journal De Mayotte actualité. *Le Journal De Mayotte*. Retrieved from:  
 2471 <https://lejournaldemayotte.yt/2018/05/23/seisme-le-maire-de-mamoudzou-appelle-la->  
 2472 [population-au-calme/](https://lejournaldemayotte.yt/2018/05/23/seisme-le-maire-de-mamoudzou-appelle-la-population-au-calme/)
- 2473 Perzo, A. (2018b, June 2). Séismes : « Nous ne devrions pas avoir de magnitude supérieure à  
 2474 6 », affirme la mission d'experts - Le Journal De Mayotte actualité. *Le Journal De Mayotte*.  
 2475 Retrieved from:  
 2476 <https://lejournaldemayotte.yt/2018/06/02/seismes-nous-naurons-pas-de-magnitude->  
 2477 [superieure-a-6-affirme-la-mission-dexperts/](https://lejournaldemayotte.yt/2018/06/02/seismes-nous-naurons-pas-de-magnitude-superieure-a-6-affirme-la-mission-dexperts/)
- 2478 [Perzo, A. \(2019a, January 14\). Ça sent le gaz pour les poissons passant à l'est de Mayotte - Le](#)  
 2479 [Journal De Mayotte actualité. \*Le Journal De Mayotte\*. Retrieved from:](#)  
 2480 <https://lejournaldemayotte.yt/2019/01/14/ca-sent-le-gaz-pour-les-poissons-passant-a->  
 2481 [lest-de-mayotte/](https://lejournaldemayotte.yt/2019/01/14/ca-sent-le-gaz-pour-les-poissons-passant-a-lest-de-mayotte/)
- 2482 Perzo, A. (2019b, October 10). Le volcan mahorais objet d'une journée scientifique à Paris où est  
 2483 convié le géographe Saïd Hachim - Le Journal De Mayotte actualité. *Le Journal De*  
 2484 *Mayotte*. Retrieved from:  
 2485 <https://lejournaldemayotte.yt/2019/10/10/le-volcan-mahorais-objet-dune-journee->  
 2486 [scientifique-a-paris-ou-est-convie-le-geographe-said-hachim/](https://lejournaldemayotte.yt/2019/10/10/le-volcan-mahorais-objet-dune-journee-scientifique-a-paris-ou-est-convie-le-geographe-said-hachim/)
- 2487 Picard, Y. (2019, February 8). Plus d'informations et de communication sur les séismes à

a supprimé: Perzo, A. (2018c, August 27). Séismes : Ça tremble en silence à Mayotte - Le Journal De Mayotte actualité. *Le Journal De Mayotte*. Retrieved from: <https://lejournaldemayotte.yt/2018/08/27/ca-tremble-en-silence-a-mayotte/>

- 2494 Mayotte. Retrieved January 7, 2021, from:  
 2495 [https://www.change.org/p/m-le-préfet-de-mayotte-plus-d-informations-et-de-](https://www.change.org/p/m-le-préfet-de-mayotte-plus-d-informations-et-de-communication-sur-les-séismes-à-mayotte)  
 2496 [communication-sur-les-séismes-à-mayotte](https://www.change.org/p/m-le-préfet-de-mayotte-plus-d-informations-et-de-communication-sur-les-séismes-à-mayotte)
- 2497 Poulain, P., Friant, A. L., Pedreros, R., Mangeney, A., Grandjean, G., Paquet, F., et al. (2019).  
 2498 Characterisation and numerical simulation of submarine slope instabilities offshore  
 2499 PetiteTerre (Mayotte) in the context of the on-going seismo-volcanic crisis. In *AGU Fall*  
 2500 *meeting*. AGU. Retrieved from:  
 2501 <https://agu.confex.com/agu/fm19/meetingapp.cgi/Paper/494529>
- 2502 Quarantelli, E. (2008). Conventional Beliefs and Counterintuitive Realities. *Social Research: An*  
 2503 *International Quarterly*, 75(3), 873–904. Retrieved from:  
 2504 <https://muse.jhu.edu/article/527617>
- 2505 [Regnault, M. \(2011\). Du pouvoir de la culture à la culture du pouvoir: politiques culturelles et mise](#)  
 2506 [en tourisme des patrimoines à La Réunion et à Mayotte. PhD dissertation, Paris, EHESS,](#)  
 2507 [2011.](#)
- 2508 REVOSIMA. (2020). *Compte-rendu de la campagne MAYOBS 13-2 (levés acoustiques) sur la*  
 2509 *base des premiers résultats* (p. 10). Retrieved from:  
 2510 <https://www.ipgp.fr/fr/revosima/rapports-communiques-de-presse-missions-mayobs>
- 2511 [Rodríguez, H., Diaz, W., Santos, J. M., Aguirre, B. E. \(2007\). Communicating risk and uncertainty:](#)  
 2512 [science, technology, and disasters at the crossroads. In Handbook of disaster research](#)  
 2513 [\(pp. 476-488\). Springer, New York, NY. https://doi.org/10.1007/978-0-387-32353-4\\_29](#)
- 2514 [Rodríguez, H., Trainor, J., & Quarantelli, E. L. \(2006\). Rising to the Challenges of a Catastrophe:](#)  
 2515 [The Emergent and Prosocial Behavior following Hurricane Katrina. \*The ANNALS of the\*](#)  
 2516 [American Academy of Political and Social Science, 604\(1\), 82–101.](#)  
 2517 <https://doi.org/10.1177/0002716205284677>
- 2518 Roinsard, N. (2014). Conditions de vie, pauvreté et protection sociale à Mayotte : une approche  
 2519 pluridimensionnelle des inégalités. *Revue française des affaires sociales*, (4), 28–49.

- 2520 <https://doi.org/10.3917/rfas.144.0028>
- 2521 [Roinsard, N. \(2019\). Une jeunesse en insécurité. \*Plein droit\*, \(1\), 32-35. https://doi-org.ezproxy.u-](https://doi-org.ezproxy.u-paris.fr/10.3917/pld.120.0032)
- 2522 [paris.fr/10.3917/pld.120.0032](https://doi-org.ezproxy.u-paris.fr/10.3917/pld.120.0032)
- 2523 Saurel, J.-M., Aiken, C., Jacques, E., Lemoine, A., Crawford, W. C., Lemarchand, A., et al. (2019).
- 2524 High-Resolution Onboard Manual Locations of Mayotte Seismicity since March 2019,
- 2525 Using Local Land and Seafloor Stations. In *AGU Fall meeting*. AGU. Retrieved from
- 2526 <https://agu.confex.com/agu/fm19/meetingapp.cgi/Paper/517350>
- 2527 [Saurel, J. M., Jacques, E., Aiken, C., Lemoine, A., Retailleau, L., Lavayssière, A., ... & Feuillet,](https://doi.org/10.1093/gji/ggab392)
- 2528 [N. \(2021\). Mayotte seismic crisis: building knowledge in near real-time by combining land](https://doi.org/10.1093/gji/ggab392)
- 2529 [and ocean-bottom seismometers, first results. \*Geophysical Journal International\*, 228\(2\),](https://doi.org/10.1093/gji/ggab392)
- 2530 [1281-1293. https://doi.org/10.1093/gji/ggab392](https://doi.org/10.1093/gji/ggab392)
- 2531 [Scanlon, J. \(2007\). Unwelcome irritant or useful ally? The mass media in emergencies. In](https://doi.org/10.1007/978-0-387-32353-4_24)
- 2532 [Handbook of disaster research \(pp. 413-429\). Springer, New York, NY.](https://doi.org/10.1007/978-0-387-32353-4_24)
- 2533 [https://doi.org/10.1007/978-0-387-32353-4\\_24](https://doi.org/10.1007/978-0-387-32353-4_24)
- 2534 Shah, H. C. (2006). The last mile: earthquake risk mitigation assistance in developing countries.
- 2535 *Philosophical Transactions of the Royal Society A: Mathematical, Physical and*
- 2536 *Engineering Sciences*, 364(1845), 2183–2189. <https://doi.org/10.1098/rsta.2006.1821>
- 2537 Sharma, U., & Patt, A. (2012). Disaster warning response: the effects of different types of personal
- 2538 experience. *Natural Hazards*, 60(2), 409–423.
- 2539 <https://doi.org/10.1007/s11069-011-0023-2>
- 2540 [Skotnes, R. Ø., Hansen, K., & Krøvel, A. V. \(2021\). Risk and crisis communication about invisible](https://doi.org/10.30658/jicrcr.4.2.9)
- 2541 [hazards. \*Journal of International Crisis and Risk Communication Research\*, 4\(2\), 413-438.](https://doi.org/10.30658/jicrcr.4.2.9)
- 2542 <https://doi.org/10.30658/jicrcr.4.2.9>
- 2543 Sira, C., Schlupp, A., Regis, E., & Van der Woerd, J. (2018). *BCSF - Essaim sismique à l'est de*
- 2544 *Mayotte. Analyse pour la période du 10 mai au 15 juin 2018* (Note préliminaire du BCSF-
- 2545 RENASS No. BCSF-RENASS2018-R4) (p. 62). BCSF-RENASS. Retrieved from

- 2546 [http://www.franceseisme.fr/donnees/intensites/2018/180515\\_1548/Note\\_macro-BCSF-](http://www.franceseisme.fr/donnees/intensites/2018/180515_1548/Note_macro-BCSF-)  
2547 [RENASS-Mayotte-13-07-2018-BD.pdf](#)
- 2548 Solnit, R. (2010). *A paradise built in hell: The extraordinary communities that arise in disaster*.  
2549 Penguin.
- 2550 Sorensen, J. H. (2000). Hazard Warning Systems: Review of 20 Years of Progress. *Natural*  
2551 *Hazards Review*, 1(2), 119–125.  
2552 [https://doi.org/10.1061/\(ASCE\)1527-6988\(2000\)1:2\(119\)](https://doi.org/10.1061/(ASCE)1527-6988(2000)1:2(119))
- 2553 [Sorensen, J.H., & Sorensen, B.V. \(2018\). Community processes: warning and evacuation. In](#)  
2554 [Handbook of disaster research \(pp. 476-488\). Springer, New York, NY.](#)  
2555 [https://doi.org/10.1007/978-0-387-32353-4\\_29](https://doi.org/10.1007/978-0-387-32353-4_29)
- 2556 Stewart, I. S., & Lewis, D. (2017). Communicating contested geoscience to the public: Moving  
2557 from 'matters of fact' to 'matters of concern.' *Earth-Science Reviews*, 174, 122–133.  
2558 <https://doi.org/10.1016/j.earscirev.2017.09.003>
- 2559 Stewart, I. S., Ickert, J., & Lacassin, R. (2018). Communicating Seismic Risk: the Geoethical  
2560 Challenges of a People-Centred, Participatory Approach. *Annals of Geophysics*, 60, 19.  
2561 <https://doi.org/10.4401/ag-7593>
- 2562 [Tierney, K. J., Lindell, M. K., & Perry, R. W. \(2001\). Facing the unexpected: Disaster](#)  
2563 [preparedness and response in the United States. Washington DC: Joseph Henry Press.](#)
- 2564 Thordarson, T., & Self, S. (1993). The Laki (Skaftár Fires) and Grímsvötn eruptions in 1783–1785.  
2565 *Bulletin of Volcanology*, 55(4), 233–263.  
2566 <https://doi.org/10.1007/BF00624353>
- 2567 Tzevahirtzian, A., Zaragosi, S., Bachèlery, P., Biscara, L., & Marchès, E. (2021). Submarine  
2568 morphology of the Comoros volcanic archipelago. *Marine Geology*, 432, 106383.  
2569 <https://doi.org/10.1016/j.margeo.2020.106383>
- 2570 [UNISDR. \(2015\). Sendai Framework for Disaster Risk Reduction 2015-2030. Geneva: United](#)  
2571 [Nations Office for Disaster Risk Reduction. Retrieved from:](#)

- 2572 <https://www.preventionweb.net/publications/view/43291>
- 2573 Vey, T. (2019, October 25). Comment Mayotte a accouché d'un volcan. *Le Figaro*. Retrieved  
 2574 from: [https://www.lefigaro.fr/sciences/comment-mayotte-a-accouche-d-un-volcan-](https://www.lefigaro.fr/sciences/comment-mayotte-a-accouche-d-un-volcan-20191025)  
 2575 [20191025](https://www.lefigaro.fr/sciences/comment-mayotte-a-accouche-d-un-volcan-20191025)
- 2576 Walker, I. (2019). *The Production of Identities on the Island of Mayotte: A Historical Perspective.*  
 2577 *Travelling Pasts: The Politics of Cultural Heritage in the Indian Ocean World* (pp. 246–  
 2578 270). Brill. [https://doi.org/10.1163/9789004402713\\_012](https://doi.org/10.1163/9789004402713_012)
- 2579 Wei-Haas, M. (2019, May 21). Strange seismic waves rippled around Earth. Now we may know  
 2580 why. *National Geographic*. Retrieved from:  
 2581 [https://www.nationalgeographic.com/science/article/strange-waves-rippled-around-earth-](https://www.nationalgeographic.com/science/article/strange-waves-rippled-around-earth-may-know-why)  
 2582 [may-know-why](https://www.nationalgeographic.com/science/article/strange-waves-rippled-around-earth-may-know-why)
- 2583 YD. (2018, May 16). Séismes : cellule de crise à la préfecture - Le Journal De Mayotte actualité.  
 2584 *Le Journal De Mayotte*. Retrieved from:  
 2585 [https://lejournaldemayotte.yt/2018/05/16/seismes-cellule-de-crise-a-la-prefecture-ce-](https://lejournaldemayotte.yt/2018/05/16/seismes-cellule-de-crise-a-la-prefecture-ce-matin/)  
 2586 [matin/](https://lejournaldemayotte.yt/2018/05/16/seismes-cellule-de-crise-a-la-prefecture-ce-matin/)
- 2587 YD. (2019, August 9). Séismes : le groupe Facebook STTM reçu en préfecture. *Le Journal De*  
 2588 *Mayotte*. Retrieved from:  
 2589 [https://lejournaldemayotte.yt/2019/08/09/seismes-le-groupe-facebook-sttm-recu-en-](https://lejournaldemayotte.yt/2019/08/09/seismes-le-groupe-facebook-sttm-recu-en-prefecture/)  
 2590 [prefecture/](https://lejournaldemayotte.yt/2019/08/09/seismes-le-groupe-facebook-sttm-recu-en-prefecture/)
- 2591 YD. (2020, November 2). Semaine du volcan : un risque tsunami "assez limité" - Le Journal De  
 2592 Mayotte actualité. *Le Journal De Mayotte*. Retrieved from  
 2593 [https://lejournaldemayotte.yt/2020/11/02/semaine-du-volcan-un-risque-tsunami-assez-](https://lejournaldemayotte.yt/2020/11/02/semaine-du-volcan-un-risque-tsunami-assez-limite/)  
 2594 [limite/](https://lejournaldemayotte.yt/2020/11/02/semaine-du-volcan-un-risque-tsunami-assez-limite/)
- 2595 YD. (2021, March 24). Nouveau volcan, des infographies pour aider à comprendre ce qui se  
 2596 passe en profondeur - Le Journal De Mayotte actualité. *Le Journal De Mayotte*. Retrieved  
 2597 from <https://lejournaldemayotte.yt/?p=138039>



Page 10 : [1] a supprimé Maud Devès 31/12/2021 18:35:00

▼  
Page 18 : [2] a supprimé Maud Devès 01/01/2022 15:31:00

▼  
Page 18 : [3] a supprimé Maud Devès 02/01/2022 10:31:00

▼  
Page 22 : [4] a supprimé Maud Devès 01/01/2022 21:17:00

▼  
Page 22 : [5] a supprimé Maud Devès 01/01/2022 21:59:00

▼  
Page 22 : [6] a supprimé Maud Devès 03/01/2022 17:49:00

▼  
Page 22 : [7] a mis en forme Maud Devès 31/12/2021 18:35:00

Police :9 pt, Couleur de police : Automatique

▼  
Page 25 : [8] a supprimé Maud Devès 02/01/2022 13:37:00

▼  
Page 25 : [8] a supprimé Maud Devès 02/01/2022 13:37:00

▼  
Page 25 : [8] a supprimé Maud Devès 02/01/2022 13:37:00

▼  
Page 25 : [8] a supprimé Maud Devès 02/01/2022 13:37:00

▼  
Page 25 : [8] a supprimé Maud Devès 02/01/2022 13:37:00

▼  
Page 25 : [8] a supprimé Maud Devès 02/01/2022 13:37:00

▼  
Page 25 : [8] a supprimé Maud Devès 02/01/2022 13:37:00

▼  
Page 25 : [8] a supprimé Maud Devès 02/01/2022 13:37:00

▼  
Page 25 : [9] a supprimé Maud Devès 02/01/2022 13:38:00

▼  
Page 25 : [9] a supprimé Maud Devès 02/01/2022 13:38:00

▼  
Page 25 : [9] a supprimé Maud Devès 02/01/2022 13:38:00

▼  
Page 25 : [9] a supprimé Maud Devès 02/01/2022 13:38:00

▼  
Page 25 : [9] a supprimé Maud Devès 02/01/2022 13:38:00

▼  
Page 25 : [9] a supprimé Maud Devès 02/01/2022 13:38:00

▼  
Page 25 : [9] a supprimé Maud Devès 02/01/2022 13:38:00

▼  
Page 25 : [9] a supprimé Maud Devès 02/01/2022 13:38:00

▼  
Page 25 : [9] a supprimé Maud Devès 02/01/2022 13:38:00

▼  
Page 25 : [9] a supprimé Maud Devès 02/01/2022 13:38:00

▼  
Page 25 : [9] a supprimé Maud Devès 02/01/2022 13:38:00

▼  
Page 25 : [9] a supprimé Maud Devès 02/01/2022 13:38:00

▼  
Page 25 : [9] a supprimé Maud Devès 02/01/2022 13:38:00

▼  
Page 25 : [9] a supprimé Maud Devès 02/01/2022 13:38:00

▼  
Page 25 : [10] a supprimé Maud Devès 02/01/2022 13:39:00

▼  
Page 25 : [10] a supprimé Maud Devès 02/01/2022 13:39:00

▼  
Page 25 : [10] a supprimé Maud Devès 02/01/2022 13:39:00

▼  
Page 25 : [10] a supprimé Maud Devès 02/01/2022 13:39:00

▼  
Page 25 : [10] a supprimé Maud Devès 02/01/2022 13:39:00

▼  
Page 25 : [10] a supprimé Maud Devès 02/01/2022 13:39:00

▼  
Page 25 : [10] a supprimé Maud Devès 02/01/2022 13:39:00

▼  
Page 25 : [10] a supprimé Maud Devès 02/01/2022 13:39:00

▼  
Page 25 : [10] a supprimé Maud Devès 02/01/2022 13:39:00

▼  
Page 25 : [10] a supprimé Maud Devès 02/01/2022 13:39:00

▼  
Page 25 : [10] a supprimé Maud Devès 02/01/2022 13:39:00

▼  
Page 25 : [10] a supprimé Maud Devès 02/01/2022 13:39:00

▼  
**Page 25 : [10] a supprimé Maud Devès 02/01/2022 13:39:00**

▼  
**Page 25 : [11] a supprimé Maud Devès 02/01/2022 14:03:00**

▼  
**Page 25 : [11] a supprimé Maud Devès 02/01/2022 14:03:00**

▼  
**Page 25 : [11] a supprimé Maud Devès 02/01/2022 14:03:00**

▼  
**Page 25 : [11] a supprimé Maud Devès 02/01/2022 14:03:00**

▼  
**Page 25 : [11] a supprimé Maud Devès 02/01/2022 14:03:00**

▼  
**Page 25 : [11] a supprimé Maud Devès 02/01/2022 14:03:00**

▼  
**Page 25 : [11] a supprimé Maud Devès 02/01/2022 14:03:00**

▼
